# Supplementary material
Source: publisher site journal article supplement (https://www.dovepress.com/article/394133)
Supplement: Supplementary file 1 [file get_supplementary_file.php]

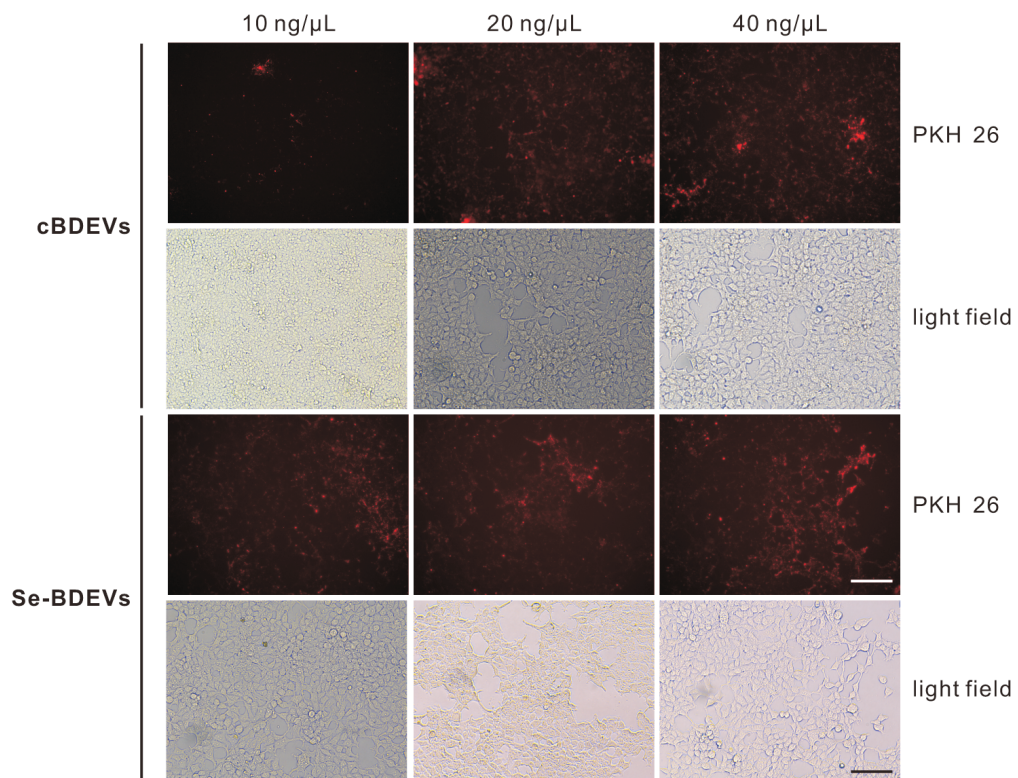

**Figure S1** Uptake of cBDEVs and Se-BDEVs. cBDEVs and Se-BDEVs labeled with PKH-26 were observed by fluorescence microscopy with the view of the light field, scale bar = 50  $\mu$ m.

A

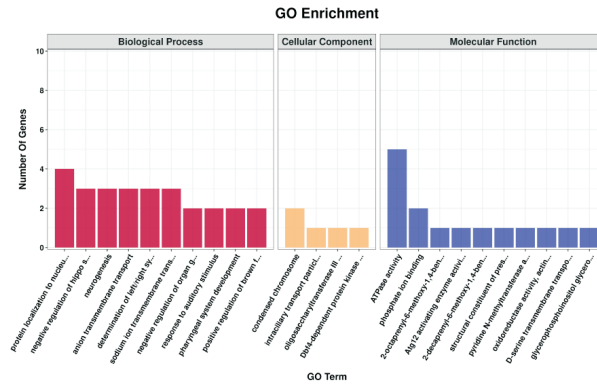

B

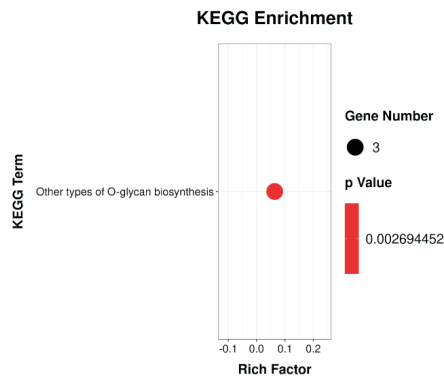

**Figure S2** Functional analysis of *peu*-miR2916-p5\_1ss3AG (miR2916-p5) target genes (TGs). (A) GO analysis of miR2916-p5 TGs. (B) KEGG enrichment analysis of miR2916-p5 TGs.

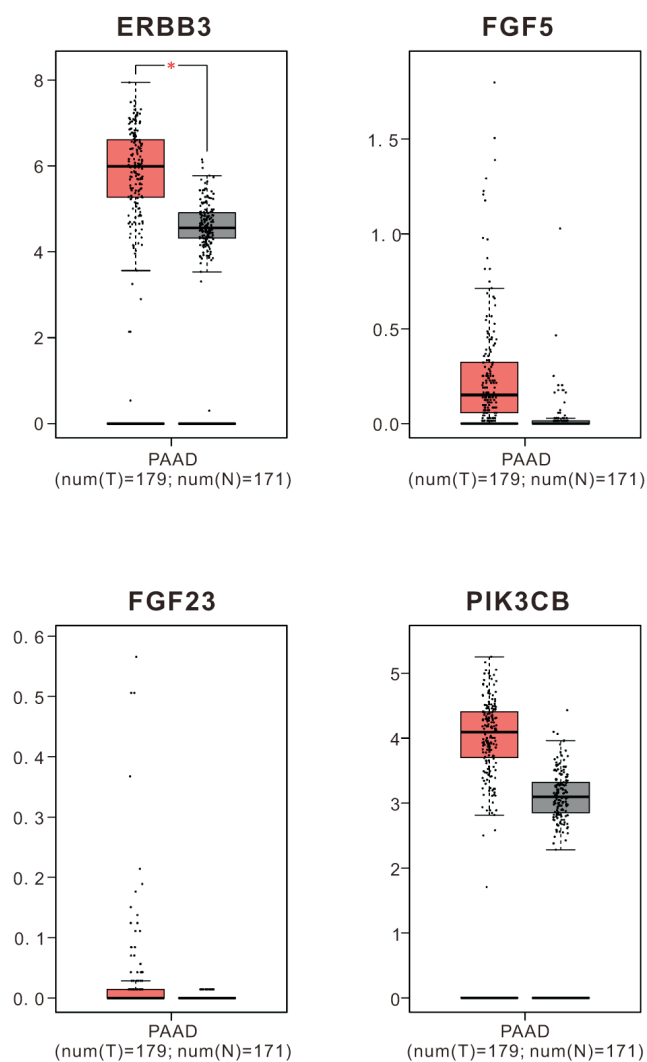

**Figure S3** Gene Expression Profiling Interactive Analysis (GEPIA) was utilized for analyzing ERBB3, FGF23, PIK3CB, and FGF5 expression in pancreatic cancer and normal tissues. \* $p < 0.05$ .

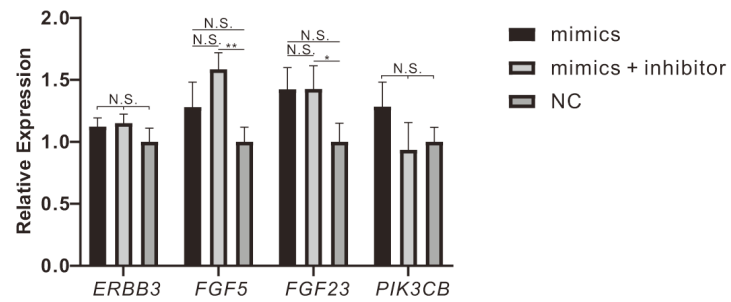

**Figure S4** RT-PCR was utilized for detecting ERBB3, FGF5, FGF23, and PIK3CB expression in PANC-1 cells transfected with miR167a mimics, miR167a mimics + inhibitor, and miR167a NC, respectively. \* $p < 0.05$ , \*\* $p < 0.01$ , N.S., not significant.

Supplementary Table 1. All annotated miRNAs in miRNA-seq

| miR_name                   | annotation | miR_seq                 | up/down | pvalue(t_test) | BDEVs(mean) | Se-BDEVs(mean) | log2(fold_change) | BDEVs_1 | BDEVs_2 | Se-BDEVs_1 | Se-BDEVs_2 | Se-BDEVs_3 |
|----------------------------|------------|-------------------------|---------|----------------|-------------|----------------|-------------------|---------|---------|------------|------------|------------|
| bna-miR159_R-3             | known      | TTGGATTGAAGGGAGCT       | up      | 0.147394396    | 90.63025728 | 131.9645619    | 0.542085871       | 90.90   | 90.36   | 154.68     | 144.60     | 96.61      |
| bra-miR158-3p              | candidate  | TTTCCAAATGTAGACAAAGCA   | down    | 0.5            | 8.521807796 | 0              | -inf              | 17.04   | 0       | 0          | 0          | 0          |
| bna-miR394a                | known      | TTGGCATTCTGTCCACCTCC    | up      | 0.293112393    | 0           | 10.99288299    | inf               | 0       | 0       | 26.02      | 0          | 6.96       |
| aly-miR319c-3p_R-1         | candidate  | TTGGACTGAAGGGAGCTCCT    | up      | 0.231391349    | 1.928399145 | 43.10936448    | 4.482525694       | 0.71    | 3.15    | 28.91      | 90.38      | 10.04      |
| aly-miR319a-3p_R-1         | candidate  | TTGGACTGAAGGGAGCTCCC    | up      | 0.104884606    | 0.844553847 | 26.86792195    | 4.991551524       | 0.71    | 0.98    | 33.73      | 38.16      | 8.71       |
| aly-miR858-5p_L-1R-1       | candidate  | TTCGTTGTCTGTTTCGACCT    | up      | 0.422649731    | 0           | 0.662610191    | inf               | 0       | 0       | 0          | 0          | 1.99       |
| cca-miR6118-3p_1ss15AG     | candidate  | TTCCGAGGCCACCCGTTC AAC  | down    | 0.5            | 1.657018183 | 0              | -inf              | 3.31    | 0       | 0          | 0          | 0          |
| bna-miR396a                | known      | TTCCACAGCTTCTTGAACCT    | down    | 0.5            | 1.420301299 | 0              | -inf              | 2.84    | 0       | 0          | 0          | 0          |
| bol-miR398a-3p_R-2         | candidate  | TGTGTTCTCAGGTCACCCC     | up      | 0.422649731    | 0           | 1.987830573    | inf               | 0       | 0       | 0          | 0          | 5.96       |
| bra-miR164a                | candidate  | TGGAGAAGCAGGTCACGTGCA   | down    | 0.5            | 1.301942858 | 0              | -inf              | 2.60    | 0       | 0          | 0          | 0          |
| bna-miR160a_R-1            | known      | TGCCTGGCTCCCTGTGATGCC   | up      | 0.422649731    | 0           | 0.185530853    | inf               | 0       | 0       | 0          | 0          | 0.56       |
| cas-miR408_L-1R+1          | candidate  | TGCACTGCCTCTTCCTGGCT    | up      | 0.31275874     | 0           | 19.96183996    | inf               | 0       | 0       | 49.15      | 0          | 10.73      |
| cme-miR171h_R-2            | candidate  | TGATTGAGCCGCGTCAATA     | up      | 0.422649731    | 0           | 0.530088153    | inf               | 0       | 0       | 0          | 0          | 1.59       |
| bna-miR171f                | known      | TGATTGAGCCGCGCCAATATC   | down    | 0.5            | 0.631245022 | 0              | -inf              | 1.26    | 0       | 0          | 0          | 0          |
| cca-MIR167-p3_2ss3TA17TA_3 | candidate  | TGAGTGTGTGTGTGTGAGTGTGT | down    | 0.5            | 46.15979223 | 0              | -inf              | 92.32   | 0       | 0          | 0          | 0          |
| cca-MIR167-p3_2ss3TA17TA_2 | candidate  | TGAGTGTGTGTGTGTGAGTGTG  | down    | 0.5            | 46.15979223 | 0              | -inf              | 92.32   | 0       | 0          | 0          | 0          |
| cca-MIR167-p5_2ss3TA17TA_1 | candidate  | TGAGTGTGTGTGTGTGAGTGT   | down    | 0.5            | 46.15979223 | 0              | -inf              | 92.32   | 0       | 0          | 0          | 0          |
| cca-MIR167-p3_2ss3TA17TA_1 | candidate  | TGAGTGTGTGTGTGTGAGTGT   | down    | 0.5            | 46.15979223 | 0              | -inf              | 92.32   | 0       | 0          | 0          | 0          |
| bna-miR156a_R-1            | known      | TGACAGAAGAGAGTGAGCAC    | down    | 0.5            | 0.184113131 | 0              | -inf              | 0.37    | 0       | 0          | 0          | 0          |
| bna-miR167a_R-2            | known      | TGAAGCTGCCAGCATGATCT    | up      | 0.013930886    | 0.235998573 | 9.681946181    | 5.358447033       | 0       | 0.47    | 7.95       | 12.05      | 9.04       |
| aly-MIR408-p3_2ss15TC17TG  | candidate  | TCTCTCTCTCCTCCCGCTC     | down    | 0.5            | 2.603885715 | 0              | -inf              | 5.21    | 0       | 0          | 0          | 0          |
| bra-MIR5719-p3_1ss21AT     | candidate  | TCGGATTATCATCACAACT     | up      | 0.459089184    | 0.131110318 | 1.45774242     | 3.474882686       | 0       | 0.26    | 0          | 0          | 4.37       |
| bna-miR166a                | known      | TCGGACCAGGCTTCATTCCCC   | up      | 0.143133343    | 2.397641521 | 23.60964608    | 3.299688537       | 4.66    | 0.14    | 24.58      | 39.16      | 7.09       |
| stu-miR166b_2ss20TC21CA    | candidate  | TCGGACCAGGCTTCATTCCCA   | down    | 0.5            | 4.497620781 | 0              | -inf              | 9.00    | 0       | 0          | 0          | 0          |
| bna-miR166f                | known      | TCGGACCAGGCTTCATTCCCC   | up      | 0.20628029     | 0           | 38.09572613    | inf               | 0       | 0       | 26.02      | 78.33      | 9.94       |
| bna-miR168a_R-1            | known      | TCGCTTGGTGCAGGTCGGGA    | down    | 0.413736921    | 1.74843625  | 0              | -inf              | 3.08    | 0.42    | 0          | 0          | 0          |
| bra-miR162-3p_R-1          | candidate  | TCGATAAACCTCTGCATCCA    | up      | 0.422649731    | 0           | 9.63749702     | inf               | 0       | 0       | 28.91      | 0          | 0          |
| ath-miR8175_L-2            | candidate  | TCCCCGCAACGGCGCCA       | down    | 0.711854249    | 2.812225604 | 1.855308534    | -0.600053212      | 4.26    | 1.36    | 0          | 0          | 5.57       |
| bol-miR824                 | candidate  | TAGACCATTGTGAGAAAGGA    | down    | 0.5            | 1.657018183 | 0              | -inf              | 3.31    | 0       | 0          | 0          | 0          |
| bol-MIR172b-p5             | candidate  | GCAGCACCATTAAGATTACACA  | down    | 0.5            | 1.657018183 | 0              | -inf              | 3.31    | 0       | 0          | 0          | 0          |
| peu-MIR2916-p3_2ss17TC18GA | candidate  | GATGCCGACCAGGGATCAGCGGA | down    | 0.147394396    | 416.0136686 | 291.215208     | -0.514545232      | 415.20  | 416.83  | 222.63     | 253.06     | 397.96     |
| bra-miR158-5p              | candidate  | CTTTGTCTATCGTTGGAAAAG   | up      | 0.576334385    | 0.471997146 | 1.45774242     | 1.626885779       | 0       | 0.94    | 0          | 0          | 4.37       |
| nta-MIR168a-p3_2ss17AG18AG | candidate  | CGGTGGCGGCGGCGGCGG      | down    | 0.5            | 4.615979223 | 0              | -inf              | 9.23    | 0       | 0          | 0          | 0          |
| nta-MIR168a-p5_2ss3CG20AG  | candidate  | CGGCGGTGGCGGCGGCGGCG    | down    | 0.5            | 16.80689871 | 0              | -inf              | 33.61   | 0       | 0          | 0          | 0          |
| nta-MIR168a-p3_1ss3CG      | candidate  | CGGCGGTGGCGGCGGCGGCG    | down    | 0.5            | 1.893735066 | 0              | -inf              | 3.79    | 0       | 0          | 0          | 0          |
| peu-MIR2916-p5_1ss3AG      | candidate  | CCGTCTAGTCTCAACCATA     | down    | 0.035932799    | 585.0173644 | 66.91125324    | -3.128158676      | 503.26  | 666.77  | 20.24      | 0          | 180.50     |
| bra-miR1885a               | candidate  | CATCAATGAAAGGTATGATTCC  | down    | 0.5            | 1.183584416 | 0              | -inf              | 2.37    | 0       | 0          | 0          | 0          |
| bra-miR164e-3p_R-1         | candidate  | CACGTGCTCCCTCCTCCAA     | up      | 0.422649731    | 0           | 0.662610191    | inf               | 0       | 0       | 0          | 0          | 1.99       |
| bol-miR172a_R-1            | candidate  | AGAATCTTGTATGATGCTGCA   | down    | 0.695671822    | 1.538659741 | 0.72887121     | -1.077938409      | 3.08    | 0       | 0          | 0          | 2.19       |
| mdm-MIR167f-p3_2ss8GA17TG  | candidate  | AGAAGGAAAAGAAGAAGGA     | down    | 0.5            | 2.367168832 | 0              | -inf              | 4.73    | 0       | 0          | 0          | 0          |
| ppe-miR1511-3p_L+1R-4      | candidate  | AACTGGCTCTGATACCA       | down    | 0.5            | 1.183584416 | 0              | -inf              | 2.37    | 0       | 0          | 0          | 0          |

**Supplementary table 2. Targets genes of the 41 annotated miRNAs (a total of 2556 target genes)**

| Symbol NAME |          |          |          |            |           |          |            |          |            |
|-------------|----------|----------|----------|------------|-----------|----------|------------|----------|------------|
| HOXA11      | HNRNPDL  | ALDH9A1  | INO80D   | AC018630.2 | INF2      | ZER1     | PDAP1      | RASSF7   | CDAN1      |
| RPUSD1      | FSTL1    | AK2      | ORAI2    | CORO1B     | ANKRD26   | CCR5     | RHOG       | CHMP1A   | ASAH2B     |
| SPRTN       | EIF5A2   | WAC      | SLIT3    | NLRC5      | MFN2      | LRRC14   | NMD3       | TTC28    | TSC1       |
| CD74        | PRICKLE2 | NEIL1    | TBC1D28  | ANKRD65    | DPP4      | ZNF382   | SLC66A2    | NAV3     | TRANK1     |
| CD4         | CDCP1    | HTT      | RBFOX2   | KCTD10     | STAT3     | ACOX1    | ZNF37A     | NSG1     | PRKCB      |
| RNASET2     | LZTFL1   | EYA4     | MBTD1    | SALL2      | KPNA4     | CABP5    | DGCR8      | TBC1D32  | POU3F4     |
| BOD1L1      | DTX3L    | AP3M1    | DPP6     | GGA3       | RIPK1     | STAT5B   | PSMD13     | NSD2     | ITFG2      |
| CTNS        | RHO      | CD47     | SMCR8    | TIFAB      | KAT14     | NCKAP1L  | MPI        | SFTPA1   | DEPDC5     |
| DCN         | MASP1    | NUDCD3   | KIAA1671 | EFCAB11    | MARK1     | CD300LG  | ATP2B2     | THADA    | ABCC8      |
| TLL1        | RFT1     | FBXL3    | PARD3B   | NFATC3     | COPB2     | KRT86    | ACVR2B     | DOT1L    | GNPAT      |
| APPBP2      | IL17RD   | STAU2    | PRKAR1B  | SLC22A6    | PARP1     | TAMALIN  | MKLN1      | GXYLT1   | OSBPL2     |
| AQR         | CAMK2D   | MLF1     | MBD5     | ZNF268     | PPIH      | FGF11    | ABHD2      | PHB2     | KDSR       |
| LMCD1       | DAPP1    | SLC25A46 | MECP2    | HES7       | CTSB      | WDR90    | PKIA       | HIVEP1   | TUG1       |
| CEACAM1     | IHO1     | TAT      | CBX6     | ADAMTSL1   | HNRNPA2B1 | SOX8     | LMBR1      | PLA2G4E  | ESRRB      |
| PPP2R5B     | HSPA4L   | CCR9     | ELAVL1   | FKBP5      | PCSK6     | MAP4K2   | SPPL3      | UBE2QL1  | KNG1       |
| FSTL3       | PRSS12   | AREL1    | ZFPM2    | TMEM138    | THBS2     | CYB561A3 | MAP2K4     | ZNF705G  | AL451062.2 |
| ST6GAL1     | TMEM161B | SEMA4D   | ICOSLG   | ANKK1      | CIT       | DRAXIN   | ARFIP1     | PPP4R1   | AL358113.1 |
| P2RY10      | LMBRD2   | THRB     | SLC8A1   | VPS13D     | ACO2      | AZIN2    | NSD1       | SZRD1    | GPR174     |
| TIGAR       | ANKRD33B | AADAACL2 | RNF43    | ZNF236     | PSEN2     | AGL      | DPAGT1     | CPNE1    | ST3GAL3    |
| MTMR7       | RPS23    | CCDC25   | SAMD12   | RDX        | NPEPPS    | REL      | CRKL       | SNRNP70  | GSS        |
| CDK13       | CDC20B   | RSPO1    | ITGA6    | ZNRF3      | LAMB1     | ZNF514   | ARNT       | KIAA1841 | ACBD6      |
| GAL3ST2     | GPX8     | MAN1A2   | SHANK2   | RIC1       | VCP       | SPATA18  | FAM78B     | ATG3     | ATP7A      |
| UHRF1BP1    | ANKRA2   | COG6     | FAM131B  | CAND1      | CTSA      | BMP10    | TRDMT1     | PANX2    | MSH2       |
| SLC13A1     | CCDC127  | GABRG2   | CLEC16A  | MMAB       | EIF3E     | TGFA     | WNK3       | HS1BP3   | AL590560.2 |
| PCDHB2      | TNFRSF21 | ARHGEF12 | ZC3H8    | MARS1      | NUDCD1    | FZD5     | NUTM2G     | MAFK     | SLC6A1     |
| RRN3        | CREBRF   | ELP5     | SAPCD2   | MTHFD1     | KIF5C     | IFITM3   | LARS1      | CLVS2    | TBL1X      |
| TFAP2C      | GALNT10  | RSPO3    | TTC7A    | HOXC11     | POMT1     | NXF1     | SLFN14     | SLC2A12  | GRHL2      |
| SPG21       | MYOZ3    | NHEJ1    | LSM5     | CCDC38     | GSK3B     | GANAB    | NABP1      | CDCA5    | ANKRD44    |
| RGS17       | BMPER    | ZBTB14   | VSTM5    | BICDL1     | MCL1      | ELF5     | EFCAB14    | TMEM47   | POGLUT1    |
| TGFBR3      | COL1A2   | PEX2     | TTC31    | DDX23      | QPCTL     | SSH3     | AC078815.1 | AWAT2    | PDE10A     |
| TMED1       | LMTK2    | SLC30A6  | METTL21A | NUBPL      | PABPC1    | CHORDC1  | ADGRL2     | FRMPD3   | ENPP1      |

|          |             |          |         |            |            |          |         |         |            |
|----------|-------------|----------|---------|------------|------------|----------|---------|---------|------------|
| MMP11    | RAD21       | SPOCK3   | ZNF142  | PCBP2      | CTSC       | PRR23D1  | AKAP9   | FBXO25  | AC010197.2 |
| MICALL1  | OSGIN2      | DCHS2    | PLB1    | BICD1      | PITRM1     | EFEMP2   | HSPA12A | TACC1   | CTPS1      |
| HMGXB4   | RAD54B      | ZBTB20   | DKC1    | CS         | EIF3I      | FAM186B  | AGO1    | FBXO10  | LRRC3B     |
| TAB1     | ZMAT4       | CCR3     | PRR29   | AL139353.1 | AC064824.1 | RAD50    | NPHP1   | NTRK2   | UROS       |
| CNIH1    | KIF27       | TENT4B   | PIGZ    | DAO        | C2CD3      | EXT2     | IFT172  | ASB6    | ZC3HC1     |
| SPTLC2   | PGM2L1      | RIMKLB   | AEBP1   | DNAJC22    | HSP90B1    | RHCE     | DISP1   | ADD3    | FKBP6      |
| TUBB1    | PCF11       | DENND2D  | SLC35F6 | KCNC2      | KMT2C      | FBXO3    | GDAP1   | NPFFR1  | AC006059.2 |
| CSNK2A1  | JAKMIP3     | ETFBKMT  | FAM122C | RAB5B      | IFITM1     | RAB30    | SLC52A2 | SLC1A2  | FARS2      |
| APMAP    | NDRG2       | CREB5    | WDR26   | SLC16A7    | OAS1       | ZNF720   | NEDD4L  | ZC3H12C | CDC42      |
| MXRA5    | ARHGEF40    | GOLGA7   | NDUFA10 | ZBED6      | SNX9       | KMT2A    | CEP104  | ATM     | TCEANC2    |
| ATP1B4   | CLMN        | ZBTB44   | SLC23A3 | DYNLL1     | DYNC1H1    | B4GALNT4 | CLCC1   | ZNF343  | GAN        |
| F9       | GPR176      | CADPS    | MTO1    | SLC48A1    | CTSZ       | ANKLE2   | HLCS    | CEP164  | ZNF620     |
| FMR1     | FOXN4       | NFIA     | UPB1    | SENPI      | SLC1A3     | C5orf63  | IGHMBP2 | CABLES2 | HDAC8      |
| PCSK1N   | ADAMTS15    | ST7L     | TNFAIP8 | TUBA1C     | OAS2       | ZNF423   | LCOR    | HIRIP3  | AC097625.1 |
| NUTF2    | GABRB3      | CNTNAP3  | EZH1    | MARF1      | ERN1       | TMEM106A | NGLY1   | DUSP6   | DYNC2H1    |
| SLC38A7  | TMEM132B    | ZNF346   | ITPRID2 | ESPL1      | OCLN       | SPOCK2   | CAST    | ARID5B  | FANCC      |
| SMPD3    | BORCS7-ASMT | ICA1L    | POU6F2  | B4GALNT1   | TCTN1      | RFXANK   | PLCE1   | SPOPL   | AC013489.1 |
| HSDL1    | TRIM44      | CX3CR1   | CLEC17A | LIN7A      | DDX20      | KIAA1958 | DYM     | CD226   | TTC37      |
| ZNF500   | IDH3A       | POM121   | LMBR1L  | ANKRD13A   | TNPO1      | PTPN21   | AARS1   | FREM2   | HSPA9      |
| TOX3     | HDGFL3      | GDA      | CCDC103 | PPP2R3C    | MAP3K14    | MS4A4A   | RBMS3   | CCSER1  | HTR5A      |
| MGA      | ZNF407      | TRIM33   | NAPEPLD | SYNE2      | ALS2       | GZF1     | COPS2   | SLC12A2 | IGF1R      |
| EHD4     | GALR1       | PPP1CB   | USP54   | NRDE2      | AGT        | ENOX2    | DCP2    | PSMG4   | ADA2       |
| EXTL3    | TVP23A      | PRKAR1A  | DNAJC10 | ALDH6A1    | CTSV       | PHF8     | DENND5B | FAM193B | AC097634.4 |
| PAG1     | ZNF592      | SLC4A8   | SNAP47  | DNAL1      | ACADM      | CDIN1    | PRTG    | FBXL5   | CEP63      |
| DECR1    | AP1G1       | SYN3     | TAF4B   | STON2      | HMGCR      | ADCY2    | TBR1    | JADE1   | KDM5B      |
| PLAT     | CLPX        | BCAS4    | TP63    | SHMT2      | FAM126A    | ACACB    | TMEM72  | SH3BP2  | DNAJC13    |
| TBC1D17  | NEMP1       | MAP2K6   | SMYD1   | PSMC6      | VRK1       | GLS      | SHOX2   | C4orf54 | ITGA1      |
| SGTA     | NAB2        | ANKRD12  | BCL6    | PRPF39     | EIF4G3     | SLC25A15 | ARHGAP8 | TRIO    | ACSL6      |
| C19orf44 | STAT6       | MAP3K15  | RASGRF1 | TCL1A      | CNGB3      | ZNF81    | LYST    | ADGRL3  | C9orf57    |
| FSD1     | GPRC5B      | RRAGD    | UBE2W   | CYP46A1    | CANX       | TRIM2    | EIF4E3  | HARS1   | PPOX       |
| CRX      | CRK         | FRA10AC1 | CDV3    | C14orf132  | MAPK1IP1L  | GAS2     | MTR     | SATB1   | PGRMC2     |
| CDC37    | TPM4        | SNX11    | TSPYL4  | LIN52      | ASAH2      | SYT9     | LAMA4   | SCNN1A  | PGM2       |

|         |           |         |            |          |          |          |                    |         |           |
|---------|-----------|---------|------------|----------|----------|----------|--------------------|---------|-----------|
| RAB3D   | RSKR      | ZNF705A | RECQL5     | TMEM229B | SPECC1   | ZNF705E  | SCLT1              | PARVB   | NEIL3     |
| USF2    | DIP2B     | LDLRAD4 | ZNF345     | TMEM30B  | RABL2B   | LRRK1    | PRKD1              | SMTNL2  | CEP192    |
| SIPA1L3 | SLC22A11  | RUNX2   | LMOD3      | NSFL1C   | DDHD1    | BTG4     | BDH1               | ZC3H12B | NCAPG     |
| NAMPT   | MSANTD4   | DSE     | FLNA       | PPP2R5C  | TRPS1    | DERA     | ADAMTS5            | LRP1    | ATP8A1    |
| SP4     | TNRC6B    | AP4M1   | FNBP1      | SLC7A7   | SREBF1   | FNTA     | RGR                | NEDD4   | BDP1      |
| MPP6    | SLAMF1    | ZRANB1  | WDR6       | RIN3     | CDKL1    | DBF4B    | NNT                | SMIM15  | CSF1R     |
| TSPAN12 | FUT9      | ZDHHC14 | WDR48      | TMEM260  | MOV10L1  | IFITM2   | RAD54L             | ATAD3A  | LMNA      |
| WASL    | PCSK9     | CTAG1B  | ZNF286A    | APIG2    | ATP6V1C1 | TP53AIP1 | DLG1               | OASL    | TADA2B    |
| CEP41   | MAP4K4    | ATG2B   | PERP       | SYNE3    | LRRC2    | C11orf65 | ADGRL4             | YIF1B   | TNFRSF10C |
| ZNF862  | ELOVL6    | FAM3C   | RBM14-RBM4 | TOGARAM1 | CDRT1    | BCLAF1   | MYSM1              | SCARB1  | CYP4F12   |
| TNFSF8  | CCDC7     | NFIX    | ATF2       | WDR93    | ELMO1    | ZNF585B  | SCN8A              | ANKRD6  | LRRCC1    |
| SETX    | CKAP2L    | MAK16   | DIO2       | GDPGP1   | GCNT3    | PCDHGA2  | AP3B2              | NECAP1  | ANK1      |
| NUFIP2  | ANKRD49   | ZNF605  | KIAA1549   | RHCG     | ZNF445   | RPS6KA4  | SCN3B              | OFD1    | DENND3    |
| P2RX1   | STARD5    | ETS2    | EIF2AK1    | MEX3B    | JMY      | ARHGAP27 | CUL1               | DOK4    | SLC36A2   |
| CPD     | UBTF      | MSN     | L3MBTL1    | USP3     | KRBA2    | DPF2     | RET                | SP100   | NKX6-3    |
| DDX5    | SIX2      | VPS13A  | PGAP1      | INO80    | PGM5     | OLFML1   | BRPF1              | MEF2C   | KCTD9     |
| LRRC59  | PDS5A     | MYLK    | PHF14      | SHISA9   | TCEA1    | SLC7A8   | CEP290             | LIN54   | POLB      |
| FOXN1   | RNF139    | ANKS1A  | SEL1L2     | HMBOX1   | RSL1D1   | POLG     | ALDH3A2            | PTAR1   | JPH1      |
| ZPR1    | REPS2     | PEA15   | CACNA2D2   | ATP8B4   | DKK3     | PRR23D2  | AL135905.2         | UPK3BL1 | NDUFAF6   |
| CCND1   | AGAP1     | ANGEL2  | OARD1      | DUOXA1   | TMEM106B | ABCC12   | JAK1               | BCLAF3  | CCAR2     |
| MLEC    | TTBK1     | PFKFB3  | CCDC150    | DNAJC17  | BICRA    | SLC38A6  | ATAD3B             | PAQR9   | SREK1     |
| CSRNP2  | MYO1B     | MMP17   | FKBP7      | PSTPIP1  | IL31RA   | POGLUT3  | AC018809.3         | RRP1B   | RUNX1T1   |
| SYT10   | ADCYAP1R1 | TPPP    | TANC2      | TM2D3    | ZSCAN29  | DIS3L    | ZNF599             | FAM205C | MROH5     |
| OAS3    | KNDC1     | CLCN3   | ZDHHC3     | SEMA4B   | HRH1     | USP35    | CPS1               | ZNF169  | PIK3R1    |
| NUP107  | JPT1      | SLA2    | CPLANE1    | TRPM1    | PAFAH1B1 | BDNF     | RFX7               | TNC     | CYFIP2    |
| TPI1    | MUC7      | SCUBE1  | SGCE       | EME2     | FOXRED2  | PPM1A    | CFAP298-<br>TCP10L | FCF1    | ALG11     |
| GOLT1B  | LRATD2    | NAA60   | MYOCD      | TUBB8    | PABPN1   | ANO1     | COL13A1            | SH2B3   | KIF13B    |
| RFX4    | IRS1      | DAAM1   | LRCH3      | GLG1     | CCDC9B   | NPAT     | HEY1               | KAT5    | SMIM12    |
| ACOT13  | NECAB2    | STAT1   | C12orf65   | ZNF598   | WIF1     | ZNF678   | DENR               | BRI3BP  | SNAP91    |
| EXOC2   | MINAR1    | DCAF12  | PVR        | KLHDC4   | MMP16    | TGIF1    | PITPNM2            | DCAF5   | SPIDR     |
| VEGFA   | DEGS2     | NCKAP1  | NANOS1     | BRD7     | BACH1    | ZBED6CL  | SLC7A11            | ING4    | PPP1R2B   |
| LOX     | LCMT2     | MAP3K3  | TMEM185B   | TMEM231  | ANKRD9   | CCDC141  | C4orf33            | TMEM248 | KCNK9     |



|         |         |          |              |          |            |          |          |          |            |
|---------|---------|----------|--------------|----------|------------|----------|----------|----------|------------|
| LNPEP   | FEN1    | LDB3     | ZDHHC17      | RGL3     | RAB11FIP1  | RNF222   | PTPRO    | GRM8     | ZDHHC11B   |
| ST8SIA4 | PPM1D   | TNNI1    | TMEM233      | MLYCD    | NTAQ1      | RUFY4    | VPS26B   | ANKFY1   | PNMA2      |
| SLC7A14 | LRP8    | LRRC10   | KAT6A        | PML      | CYB5RL     | CA12     | KCTD16   | CRHR2    | NDUFB9     |
| CRBN    | IBTK    | FAM110B  | EIF4A2       | CCDC187  | KIT        | PRR27    | SFXN1    | ZNF70    | CA2        |
| ABTB1   | ATOH8   | BRINP2   | ZNF398       | CNTROB   | ZNF19      | SH3BP4   | KDM3B    | SLC24A2  | ERICH1     |
| TTL     | LGI3    | NAA35    | SEMA3E       | MINAR2   | MYO1E      | PCNX2    | APC      | UBE2L3   | ITGB2      |
| TLX2    | ZNF396  | QKI      | ZNF737       | BEAN1    | TMEM268    | SIGLEC1  | ZDHHC18  | JPH2     | LYRM2      |
| DOK1    | BPTF    | CIPC     | NANS         | NOMO2    | DPYSL5     | FRMD6    | GRM4     | DCDC1    | DGLUCY     |
| IGFBP5  | ZNF672  | ASTN1    | PHACTR2      | PDPR     | RHPN1      | PCDH18   | SNX30    | TP53INP1 | FBXW11     |
| ORC2    | NEGR1   | MSRB1    | FGD4         | PLA2G15  | AL591806.2 | AP3D1    | SNX12    | TMEM215  | ATP6V1H    |
| COX7A2L | GON7    | CMTM3    | CYLD         | SNX29    | ZNF276     | TPRG1    | PAFAH2   | SMAD4    | DOCK2      |
| PLEKHA3 | OTUD7A  | COLGALT2 | MXD3         | ADAT1    | FAM160B2   | ARHGAP5  | MTFR1L   | FAM122B  | TBC1D9B    |
| CDC7    | KLF13   | PLXNB3   | RGPD1        | CDH1     | C8orf58    | PRICKLE1 | MACO1    | DICER1   | GFRA2      |
| VAMP4   | SUCLG2  | PCGF3    | XPO1         | CDH13    | WNT4       | RSU1     | RCAN3    | SHISA6   | TBC1D31    |
| ABCG2   | USH2A   | TRIM58   | ABHD4        | MDFIC2   | STC1       | BNC1     | EPB41L4B | RBPJL    | DNHD1      |
| ADCK1   | MAB21L4 | ZNF670   | P4HA2        | CSK      | IGF2BP1    | UBE2G2   | BMPR2    | WNT8B    | ARHGAP32   |
| PGF     | CAVIN4  | CNST     | ATP13A3      | C15orf39 | PPP1R12B   | BCL11B   | EPHB2    | STK4     | ARHGAP23   |
| NEK9    | NKIRAS2 | KIF26B   | HPS4         | ANKRD11  | CBFB       | DRD2     | ITCH     | HMCN2    | FP565260.2 |
| FLVCR2  | AFF1    | ADSS2    | PUM2         | NAE1     | ZNF235     | IL36RN   | AMER1    | LGR6     | NKAIN3     |
| TGFB3   | CARNS1  | KMO      | CERS1        | METRNL   | NR2F6      | SLC4A5   | CCDC40   | FBXW5    | SMIM11B    |
| RHOQ    | AIFM2   | B3GALNT2 | APLN         | SYT16    | KALRN      | IKZF3    | KLF8     | ACTL6A   | FP565260.6 |
| TMEM214 | RPL4    | DISC1    | ZNF625-ZNF20 | CES2     | RSPH1      | ZFYVE26  | MXRA7    | BORCS8   | VCL        |
| ATAD2B  | NUP93   | C1orf198 | TBL1XR1      | PDK3     | TRAPPC10   | STRBP    | PLA2G2F  | DPH3     | CYP26A1    |
| CRIP1   | ELF4    | OBSCN    | PLEKHM1      | TBL3     | GATD3A     | SMARCE1  | CAPZB    | MEIS1    | RFPL2      |
| SLF2    | DUSP13  | STUM     | SLC39A10     | TSC2     | LRRC3      | ADARB1   | CDC14B   | CLIC4    | TMEM272    |
| HOXB1   | RSF1    | ENAH     | AC000093.1   | ZKSCAN2  | CACFD1     | UQCC1    | SIK3     | SLC5A11  | ZEB2       |
| INSL4   | STOX2   | FBXO28   | SETD2        | SNX33    | MAPT       | WDR20    | IQSEC2   | MTHFD2   | NFAT5      |
| LRP11   | CSPG4   | PRKN     | SETD5        | SERTM2   | CHD5       | ZADH2    | COBLL1   | FKBP10   | SLC39A9    |
| FZD3    | TMOD3   | SLC30A10 | THOC2        | PIGB     | GNAO1      | ZNF660   | MCF2L    | PI4KB    | NHSL2      |
| NCAPH   | ABCD2   | SLC22A2  | YEATS2       | CDYL2    | PTPN3      | TSPEAR   | DIRAS2   | LSAMP    | CELF2      |
| ZNF211  | LINGO2  | RPS6KC1  | EIF2B5       | MMP2     | PCSK2      | CYP11B2  | MKX      | BTBD11   | STX3       |
| CPXM2   | DAG1    | NSL1     | ARMCX4       | DEXI     | ZC3H3      | DIRAS1   | S1PR3    | THOC5    | FGGY       |
| CSMD2   | EGFL7   | SLC30A1  | SMPD4        | SLC12A4  | TTPAL      | PLAAT3   | LY6G5B   | SUPT20H  | PATJ       |

|          |          |          |          |           |         |         |            |          |             |
|----------|----------|----------|----------|-----------|---------|---------|------------|----------|-------------|
| INHBA    | CTBP2    | IRF6     | SF1      | MYL4      | VAMP7   | HTR1A   | AL662899.2 | ABHD16A  | COL11A1     |
| PHF24    | REST     | TULP4    | LRRC23   | KIAA0753  | BPNT2   | FN1     | FHAD1      | DPH2     | NRXN1       |
| KLHL24   | ZHX3     | DYRK3    | SHPRH    | TRPV3     | ANOS1   | ST8SIA3 | PDPN       | ZSWIM8   | SLC35A2     |
| ZC3H13   | VPS26C   | SLC41A1  | HSBP1    | MINK1     | AJUBA   | TDRP    | CLYBL      | SLTM     | KBTBD11-OT1 |
| RAB9B    | NRIP3    | ETNK2    | DCTN1    | CA10      | TEP1    | CIITA   | HS6ST3     | FOXP1    | KIFBP       |
| SLC36A1  | PPARGC1B | ATP2B4   | NOL8     | NOMO3     | RPS6KA6 | EDNRA   | PPP1R11    | APOL4    | MAGI2       |
| PLA2G12A | SH3RF3   | ADORA1   | DHDDS    | MRTFB     | SHANK3  | DCUN1D3 | TBC1D25    | PDLIM7   | ODF4        |
| LYPD3    | KLF7     | TMEM183A | RBM6     | DHX33     | AMMECR1 | MTURN   | CARNMT1    | DENND4C  | AC068580.4  |
| ZNF391   | CHST2    | NAV1     | MDGA1    | FBXW10    | RALGAPB | PSEN1   | MOG        | AIG1     | C13orf46    |
| SSR1     | TMEM255A | CFHR3    | TAF1B    | DNAH2     | SIM1    | ANO5    | CEMP2      | EML3     | ACY1        |
| VASP     | GRAMD2A  | SASH1    | FAM160A1 | CLUAP1    | INPP4B  | CAMKK2  | SLITRK1    | POLR2M   | SCN2A       |
| CD93     | RND1     | STX11    | PLCL1    | VPS33B    | GAB1    | NUPR1   | KIF1B      | ELP1     | EPB41       |
| TMX4     | GGA2     | XPR1     | PDE1A    | CAMTA2    | MTPAP   | AHCYL2  | TRPM3      | MCCC1    | ALDH7A1     |
| CTAG2    | CLOCK    | NPHS2    | MTMR10   | VPS53     | ZNF264  | SLITRK5 | NEBL       | OSBPL9   | CACNB4      |
| TRAF2    | BAALC    | TOR3A    | ABCA7    | CARD14    | A1BG    | HMGCS1  | ZKSCAN4    | SRSF10   | AP003071.5  |
| GFER     | CYP2S1   | RALGPS2  | TMPRSS7  | BAIAP2    | CABIN1  | ANGPT2  | INSYN2B    | NF1      | PRRT2       |
| PTPN12   | CYP7B1   | HECA     | PLEKHF1  | CFAP52    | PLPPR5  | MIEF1   | DTD1       | GMPS     | EHMT1       |
| SEZ6L    | CCDC13   | PAPPA2   | RASGEF1B | SEC22B    | MED15   | LMNB2   | KCTD12     | ARHGEF26 | SMIM33      |
| CALU     | ARL10    | COP1     | SEC14L1  | FLII      | PPM1F   | BBX     | CNTNAP3B   | SNTN     | CLN5        |
| SMO      | ZDHHC24  | TNR      | IGFN1    | ENGASE    | ACTR3   | IQCE    | KLF12      | EVX1     | IL10RB      |
| PIAS1    | SUGT1    | SCYL3    | NWD1     | STARD3    | CLNS1A  | DCAF11  | HIF3A      | RINT1    | EPB41L3     |
| SNAP23   | SLC5A6   | TBX19    | NSUN5    | ACE       | KCNK6   | ARHGEF4 | KRTAP9-2   | PPM1L    | ARHGEF9     |
| TMOD2    | DCAKD    | POU2F1   | ACOXL    | SS18      | WIZ     | TRAF7   | DIS3       | PGAM5    | BMPR1A      |
| TPH1     | SULT1B1  | CCDC190  | BEND7    | NOTCH2NLA | COMMD9  | TAC4    | PCDH9      | TMEM167A | KCNMA1      |
| BCL2L2   | NEFH     | STX7     | DIXDC1   | CSF3      | LIFR    | CCNC    | GPR153     | ABCC3    | PIGT        |
| ARHGEF6  | COL6A2   | F11R     | FBXO45   | CABLES1   | DNAJC6  | GPR139  | LYPD5      | SH3TC1   | EPM2A       |
| ZC3H14   | C11orf45 | PIGM     | CBLL1    | RTTN      | APLP2   | LARP1B  | NDUFAF5    | HMCE5    | KCNC1       |
| DSC2     | TBC1D16  | ARHGAP18 | RBSN     | ANKRD30B  | SIAE    | ZNF609  | PCDHA9     | INTS3    | AC131160.1  |
| ANGEL1   | SLCO2A1  | HCN3     | GNAI2    | SMG8      | KCNT1   | ERICH3  | CASK       | DCANP1   | LIAS        |
| INTS2    | CCPG1    | HEY2     | USP46    | SPDYE4    | ARID3A  | AATK    | TRIM13     | METAP1   | ELP4        |
| SULT1C2  | MOBP     | EFNA3    | FOXP2    | RASSF5    | TOLLIP  | APOLD1  | EXT1       | ATP10D   | SMARCA2     |
| ADAMTS2  | ZNF431   | CEP85L   | MICAL3   | CCDC57    | EPB41L5 | ACAP2   | DCLRE1C    | GBA3     | AC069544.1  |

|          |            |          |             |          |          |          |          |            |        |
|----------|------------|----------|-------------|----------|----------|----------|----------|------------|--------|
| ARFGEF3  | CARHSP1    | TSPYL1   | SCAP        | NARF     | ZNF106   | AK4      | C19orf54 | AC027644.4 | NOTCH2 |
| CARD10   | PRDM2      | LRRC27   | INO80B-WBP1 | SCRN2    | SLC25A12 | EXOSC3   | FNDC3A   | IL6ST      | MED17  |
| KIAA0930 | PCSK1      | GATAD2B  | PRDM15      | TRAPPC8  | OSBP     | XKR4     | PLCH2    | INTU       | PIGN   |
| ELOF1    | SLC19A1    | CHTOP    | TGFBI       | ACP6     | USP13    | RASSF1   | XK       | AR         | SCN3A  |
| USHBP1   | FCHSD2     | LCE1E    | CAGE1       | FDXR     | SC5D     | C16orf72 | C11orf49 | NFASC      | OR2T29 |
| PXDN     | GLUL       | MFSD4B   | GMNC        | SMIM21   | SLC25A24 | ZNF704   | CCNI2    | CCDC149    | OR2AG1 |
| GATA5    | ZMYND8     | SLC16A10 | PRRC1       | MYO15B   | AGPS     | FBLN1    | RUBCNL   | CTNND2     | NOD2   |
| GINS2    | ANKS4B     | BUB3     | NLE1        | MBP      | SRD5A3   | KCNK12   | HYDIN    | LUC7L3     | OR2A12 |
| TBC1D5   | HOXB3      | NR2E1    | INTS6       | ZNF230   | ARHGAP31 | SLC24A3  | DHRS13   | SH3TC2     | OR2T6  |
| GFPT2    | FBXO31     | PLEKHA1  | ACHE        | ME2      | IL18RAP  | KCNA4    | GK       | TMEM33     | OR7C1  |
| KRTAP9-8 | AQP1       | QRSL1    | POLR2F      | PSMC3IP  | GABRA4   | SLC9A7   | CHGB     | CDC42SE2   | OR51I2 |
| CHSY1    | AL357673.1 | GRIK2    | NFIC        | ATP9B    | ARHGAP24 | MYT1     | POLR2J3  | PDCD6-AHRR |        |
| ADCY7    | MRPL52     | CACUL1   | CRY2        | TUBB6    | PIKFYVE  | PLCXD3   | PTCHD1   | ALPK1      |        |
| SLC6A11  | ERCC4      | ASCC3    | ZNF561      | CEP89    | SLC4A4   | ZNF26    | EDN1     | TADA2A     |        |
| PTCD3    | NIPAL4     | MAP3K7   | SCN11A      | ABCA5    | RAPGEFL1 | OTOP3    | FOXO1    | ZNF282     |        |
| RPA1     | ARHGAP1    | FCGR1B   | TRIM67      | HEATR6   | CASC3    | FO XK1   | HGSNAT   | OR8G1      |        |
| HSPA12B  | MEN1       | REG4     | CACNA2D4    | SLC16A2  | FBXL20   | MANEAL   | PHKA2    | SAMHD1     |        |
| SNAP25   | CLCN6      | GDAP2    | SLC25A36    | SUGP1    | DNMT3A   | CALN1    | RHOBTB3  | SLC11A2    |        |
| IMPA1    | OGFOD3     | FUNDC2   | ARPP21      | RND2     | ITGA9    | CARMIL1  | TET2     | ERCC3      |        |
| E2F5     | SRSF7      | PLXNA3   | PRRT4       | LGALS3BP | PRDM5    | SNN      | SLC25A35 | OPA1       |        |
| LYVE1    | C7         | TAZ      | HDAC9       | WDR62    | MIER2    | TMCC2    | SYAP1    | AL162377.3 |        |
| SARAF    | C8orf82    | GSTM4    | SYNE1       | ZNF519   | COL5A3   | LPAR5    | EMILIN1  | SUCLA2     |        |
| VRTN     | MRPS23     | SYPL2    | MPZL1       | HAUS5    | C3orf52  | TRAPPC6B | OR52A1   | ABCC4      |        |
| EIF2S1   | EBF1       | SFXN2    | CHTF8       | UBALD1   | CXCL9    | OPRM1    | MOSPD2   | CLCN5      |        |
| CTIF     | STAT2      | MYO6     | TWIST2      | RHPN2    | EVC      | KMT5A    | KATNAL1  | SLC33A1    |        |
| VHL      | MEIS2      | VAV3     | BEST1       | CNTD1    | MGAT4A   | ZFP41    | B3GALT5  | BTD        |        |
| CHL1     | PRKDC      | NTNG1    | BTBD3       | ZNF570   | FAM184B  | FLRT2    | TLR7     | AC073508.2 |        |
| ANO3     | PALM2AKAP2 | PRMT6    | CTC1        | PDE4A    | MAP3K13  | ANKRD17  | FRMPD4   | AC011330.3 |        |
| REGG     | MITF       | EXTL2    | B3GNT9      | BTBD2    | RASGRF2  | NR4A3    | WRNIP1   | SPG7       |        |
| SPX      | UBXN11     | KAZALD1  | TMEM120B    | WIP1     | PCNP     | NPLOC4   | BRWD1    | TCP10L     |        |
| RTL8C    | AMBRA1     | ALG14    | TMEM150C    | CHAF1A   | RBM27    | PDGFB    | SBF1     | ACSL1      |        |
| HRK      | KIF26A     | ABCD3    | TANGO2      | TUBG1    | AFF4     | CCDC88C  | ADAMTS6  | MED13L     |        |
| RNFT2    | CNOT4      | ARFGAP1  | ARV1        | BCL2     | SEMA3A   | PURA     | KIF2A    | PDK1       |        |

|          |         |          |          |            |           |           |           |          |
|----------|---------|----------|----------|------------|-----------|-----------|-----------|----------|
| BACH2    | LDLRAD3 | TMED5    | ATP13A4  | HSD17B1    | PRKAR2A   | IKZF1     | RCAN1     | SPOCK1   |
| GDF11    | ITGA11  | MTF2     | TEX22    | KIAA1328   | RPS6KA2   | SS18L1    | SLC5A3    | USP12    |
| PPP1R1A  | YOD1    | OGFRL1   | IKZF2    | AC087289.3 | ADAM2     | OPCML     | ARSD      | TRIM36   |
| GNS      | FGF13   | BARHL2   | ZNF154   | ST6GALNAC1 | CDK6      | SNAI3     | MIER3     | NADK2    |
| RGS8     | RPS4X   | ENTPD7   | KCNH8    | ANKS3      | ANLN      | WT1       | TECRL     | OTX1     |
| RC3H1    | CCNG2   | LMO4     | FHL2     | MEX3C      | DMTN      | ASB7      | CCDC91    | A1CF     |
| TMEM127  | SOX6    | PRKACB   | LCT      | ABHD17A    | LZTS1     | EEF1AKMT3 | KLHL42    | GRM1     |
| C2orf49  | AHRR    | FHL1     | UNC5C    | RNMT       | PMS2      | ING1      | LINC00634 | SMARCA5  |
| IGF2BP3  | MBLAC2  | BAG2     | ZNF611   | RANBP3     | B4GALNT3  | EFNA5     | IGF2      | RANBP2   |
| ACSBG1   | NCAM1   | BEND6    | ASNS     | ALDH16A1   | ERP27     | OLIG2     | CCP110    | CCDC148  |
| ABHD17C  | NSD3    | IFI44L   | ZKSCAN5  | NR1H2      | N4BP2L2   | RIOX2     | SGCB      | PLA2R1   |
| LIMD2    | HOXA3   | FUBP1    | SLCO2B1  | CTAG1A     | L2HGDH    | PPFIA2    | ITPRIPL2  | CD96     |
| GALNT5   | ZNF559  | PIGK     | SUN2     | LSM4       | RAB15     | MAFA      | STK35     | LPCAT1   |
| KCTD3    | MPPE1   | LRRC7    | EPS15L1  | ZNF587B    | TRIP11    | PGP       | CD274     | FBXO36   |
| IMP4     | PXMP2   | FRAT1    | TOX4     | HNRNPUL1   | ZNF280D   | BSG       | SHOX      | THY1     |
| UGGT1    | RANBP10 | LEPROT   | GALNT14  | TRPM4      | RAD51     | CRACR2A   | ZZEF1     | OTULIN   |
| RANBP6   | TLE3    | XPNPEP2  | PPP2R2D  | ZIM2       | ARRDC4    | KCTD11    | JAK2      | C10orf90 |
| PI15     | SIX5    | OPALIN   | FBXW8    | SLC35E1    | HEXA      | TRARG1    | FKBP1A    | SORBS2   |
| SLCO5A1  | S100Z   | DHCR24   | RBM45    | ZSCAN18    | ZCCHC14   | ZNF677    | METTL22   | C21orf91 |
| DCUN1D5  | PCNX4   | TTC22    | SLC20A1  | KLK3       | PDPK1     | CPEB4     | SEC14L4   | TSEN2    |
| THBS1    | PROM2   | CUL4B    | FGF5     | XRCC1      | GALNT1    | CDC42BPA  | RFX3      | MYO5B    |
| GCHFR    | WSCD1   | SLC25A27 | NPRL3    | TECR       | ASXL3     | DLST      | LGI2      | ACAA2    |
| ARHGAP29 | AMOTL1  | NKAP     | ZNF727   | CRB3       | MYH10     | PTBP3     | SOD3      | ANKRD40  |
| LOXL4    | PDLIM5  | TSHZ2    | TMED7    | INSL3      | CBX8      | PTPRB     | FBXL18    | MAN2B2   |
| ARL3     | GINS3   | PTEN     | AKR7L    | CYP2B6     | TNFRSF11A | PDZD8     | XKR6      | MARVELD1 |
| SATB2    | EDEM3   | MINPP1   | UTP25    | ZNF615     | ZCCHC2    | ZMIZ1     | KCNA1     | C16orf87 |
| HECW2    | GREM2   | CHRD1    | YJEFN3   | CD320      | FEM1A     | TRIM46    | NYNRIN    | RASA2    |
| ABI2     | NBPF3   | HECTD3   | CRAT     | MPV17L2    | CCDC97    | CHP1      | ZIC4      | TMEM87A  |
| SLC40A1  | BOK     | FAM78A   | INTS11   | ZNF671     | IFNAR1    | CELF4     | FOXL2NB   | FAM168B  |
| BCAT1    | CD276   | AIF1L    | C1orf112 | TMEM185A   | RNPEPL1   | C3orf70   | AQP4      | PSME4    |
| ABCC9    | ABL1    | POLR3A   | CDS2     | CD22       | IGLN5     | PPIL2     | TIGIT     | SRP19    |
| FOXN3    | FIBIN   | ZNF691   | LMNB1    | AC008878.2 | PRDM16    | TMEM104   | GTPBP8    | RTL8B    |
| ZNF24    | MAP6D1  | SVBP     | HPS3     | H6PD       | ARHGEF19  | SLC10A7   | CADM2     | ZNF829   |

|           |            |            |                  |            |           |         |                   |          |
|-----------|------------|------------|------------------|------------|-----------|---------|-------------------|----------|
| SNCAIP    | AC068946.1 | RIMS3      | GNAS             | FKTN       | CTTNBP2NL | SF3B1   | TRIM71            | LAIR1    |
| XYLT1     | ZFP3       | SAMD8      | AL662899.1       | RASL10B    | CD53      | RORA    | PCDHA4            | GNG4     |
| ICE2      | C1orf131   | ZMAT1      | MUTYH            | AC022400.5 | SFT2D2    | NPAS2   | CHST9             | PGBD5    |
| GPATCH2L  | PSAPL1     | BMP8B      | PARP9            | HEATR9     | FCRL4     | GRB10   | WASF2             | AKT2     |
| DSG2      | ZBTB34     | HPCAL4     | SEC31B           | BRD3OS     | KCNH1     | PSMF1   | PIP4K2B           | FAM117B  |
| HERC2     | ZNF572     | URM1       | TLE4             | MCU        | KCNN3     | DEDD2   | CAMK1D            | MOXD1    |
| COX10     | NT5DC1     | UBR2       | ADCY5            | MTRNR2L11  | GDF7      | ASXL2   | GRIP2             | CCDC50   |
| RTRAF     | FARP1      | HNF4A      | ZNF692           | GVQW3      | UBR3      | PCGF5   | SCN7A             | CD300E   |
| SLC6A4    | EPHA10     | INPP5B     | ABHD14A-<br>ACY1 | CNKSR3     | NXPE3     | ZNF202  | ABCG4             | SDK2     |
| PSMD11    | ARHGEF18   | STK40      | GPR156           | MMRN2      | TCTA      | CDCA4   | MFRP              | GRK5     |
| P2RX7     | SHROOM1    | AGO3       | MYO1G            | SCOC       | NICN1     | SNTB2   | CYP4A22           | NT5DC3   |
| GNB5      | C2orf69    | CHD6       | KRT13            | ZBTB25     | STXBP5L   | SCAI    | GRK3              | CD3G     |
| MYO5C     | HSPH1      | TOR2A      | SRPK2            | FBXW2      | SLIT2     | FNDC3B  | KRT8              | ANO4     |
| SECISBP2L | CLIP4      | VSTM2L     | ANP32A           | RALBP1     | VWA5B2    | RBBP9   | GATD3B            | POU2AF1  |
| GLCE      | PRTFDC1    | YARS1      | NOVA1            | USP6NL     | APIAR     | NRIP2   | ZNHIT3            | MTPN     |
| SLC24A1   | TENT5A     | PBX3       | CYP4A11          | PTBP2      | SPATA5    | PPP2R5E | RAB11FIP4         | STEAP3   |
| FAF2      | SLC25A22   | CHIC1      | TSNAXIP1         | ZBTB8B     | NDUFS6    | EBAG9   | EPOP              | MKS1     |
| CNOT6     | AGPAT4     | BSDC1      | CD40             | BHLHA15    | OTULINL   | PRPF4B  | SCAMP1            | LRRIQ1   |
| SERPINA10 | PAGR1      | TXLNA      | ARID1A           | KCNJ6      | RPL37     | TTC33   | SRD5A2            | SLC24A4  |
| ZDHHC2    | INPP5K     | KCTD20     | CARD19           | ITGB1      | LIX1      | GALNT16 | PRDM11            | B4GALNT2 |
| SEH1L     | B3GALNT1   | PTPRU      | RWDD1            | H3-2       | GABRB2    | SGCD    | FBXO21            | PLXNA1   |
| RPGRIP1L  | ZDHHC8     | PHACTR4    | CHAT             | SLC25A16   | AP3S2     | ATRX    | HNRNPU            | LONRF2   |
| SMAD2     | KIF1C      | PTAFR      | ADAM9            | PNLDC1     | NR2C2     | CACNA1C | JMJD7-<br>PLA2G4B | PHLPP2   |
| TRAM1     | MRFAP1L1   | TGIF2      | STIM2            | SYT6       | PTPRT     | DDI2    | GPR179            | COG5     |
| TMED2     | FMN1       | XKR8       | TSN              | NSA2       | C11orf96  | PLS3    | SMIM31            | MON2     |
| RCOR1     | PLXNA4     | IPMK       | FCGR2A           | MED22      | DDX52     | KNCN    | TTC19             | KRTAP9-9 |
| PRR11     | RAB8B      | PCDH15     | B4GALT4          | C17orf78   | PRLR      | PEG10   | SLC12A5           | CMTM4    |
| LMF1      | XRRA1      | DES        | DLG5             | MED26      | GAS2L2    | COG4    | PTPRE             | NIT2     |
| PKD1      | EHD3       | PHF20      | AC006254.1       | MGAT4C     | SLC46A1   | RUNX1   | EPS8L3            | CHD2     |
| AXIN1     | PPP2R1A    | C10orf53   | GCOM1            | CACNB2     | NAP1L1    | CCNL2   | C18orf25          | USP49    |
| UBN1      | SMC1A      | RBM12      | COG2             | CNOT3      | PTPN9     | PIIG    | ZNF131            | AKAP13   |
| KDM7A     | SHTN1      | AC105052.3 | GGT7             | MYO1F      | SMUG1     | DDR1    | IFFO1             | ZNF207   |

|         |          |         |          |         |         |        |         |        |
|---------|----------|---------|----------|---------|---------|--------|---------|--------|
| AKNAD1  | PCDHGB4  | NIN     | SCFD1    | NUDT18  | ZNF302  | COL4A5 | DACT1   | HSPA2  |
| SLC12A8 | YTHDF3   | ATP1A4  | PDHB     | POMK    | MAPKBP1 | FXN    | FAM135B | AKAP5  |
| PDZD7   | CD160    | EIF2A   | VIM      | ARCN1   | ACAD9   | KLHL29 | VDR     | CXXC4  |
| FDPS    | SERP2    | NUP205  | RABGAP1L | CDH4    | DDX60L  | PTCD2  | SLA     | CDC23  |
| AKAP17A | ALDH3B1  | RYBP    | DNAJC5   | EPHB6   | COL6A6  | STAG1  | RAPGEF3 | VSIR   |
| SRSF12  | PLEKHA2  | SCP2    | ABCB8    | AGBL1   | SPATS1  | NR6A1  | SMARCD1 | OR52E4 |
| FAM184A | RNASEH2B | ERCC6L2 | SCEL     | RPS6KA5 | MIB2    | ABCA2  | C5orf24 | OR4K2  |

**Supplementary table 3. the 10 most significantly enriched terms of KEGG**

| Pathway Id | pathway description                                  | S gene number | TS gene number | B gene number | TB gene number | Pvalue of Fisher's Exact Test |
|------------|------------------------------------------------------|---------------|----------------|---------------|----------------|-------------------------------|
| ko04724    | Glutamatergic synapse                                | 72            | 3,571          | 114           | 8,039          | 3.89E-05                      |
| ko05212    | Pancreatic cancer                                    | 50            | 3,571          | 76            | 8,039          | 1.32E-04                      |
| ko04933    | AGE-RAGE signaling pathway in diabetic complications | 61            | 3,571          | 100           | 8,039          | 5.84E-04                      |
| ko05132    | Salmonella infection                                 | 137           | 3,571          | 251           | 8,039          | 6.51E-04                      |
| ko05200    | Pathways in cancer                                   | 272           | 3,571          | 531           | 8,039          | 6.63E-04                      |
| ko02010    | ABC transporters                                     | 31            | 3,571          | 45            | 8,039          | 7.75E-04                      |
| ko04520    | Adherens junction                                    | 45            | 3,571          | 71            | 8,039          | 9.59E-04                      |
| ko04340    | Hedgehog signaling pathway                           | 33            | 3,571          | 50            | 8,039          | 1.67E-03                      |
| ko00310    | Lysine degradation                                   | 40            | 3,571          | 63            | 8,039          | 1.72E-03                      |
| ko05135    | Yersinia infection                                   | 78            | 3,571          | 137           | 8,039          | 2.01E-03                      |

**Supplementary table 4. Target genes of peu-MIR2916-p5\_1ss3AG**

| Gene ID         | Symbol    | TargetScan_score | miranda_Energy |
|-----------------|-----------|------------------|----------------|
| ENSG00000102837 | OLFM4     | 99               | -14.43         |
| ENSG00000132357 | CARD6     | 99               | -14.5          |
| ENSG00000136816 | TOR1B     | 95               | -16.79         |
| ENSG00000057704 | TMCC3     | 90               | -17.91         |
| ENSG00000111412 | SPRING1   | 94               | -11.68         |
| ENSG00000074621 | SLC24A1   | 93               | -34.77         |
| ENSG00000102974 | CTCF      | 96               | -11.73         |
| ENSG00000198522 | GPN1      | 91               | -10.99         |
| ENSG00000114850 | SSR3      | 94               | -20.46         |
| ENSG00000213064 | SFT2D2    | 90               | -17.5          |
| ENSG00000151470 | C4orf33   | 96               | -13.96         |
| ENSG00000110871 | COQ5      | 97               | -15.32         |
| ENSG00000033867 | SLC4A7    | 94               | -15.67         |
| ENSG00000164237 | CMBL      | 95               | -10.99         |
| ENSG00000164535 | DAGLB     | 96               | -15            |
| ENSG00000166716 | ZNF592    | 95               | -29.6          |
| ENSG00000166741 | NNMT      | 91               | -26.75         |
| ENSG00000167323 | STIM1     | 97               | -16.94         |
| ENSG00000171155 | C1GALT1C1 | 97               | -13.18         |
| ENSG00000174348 | PODN      | 98               | -17.19         |
| ENSG00000176454 | LPCAT4    | 90               | -20.11         |
| ENSG00000066735 | KIF26A    | 92               | -38.6          |
| ENSG00000149294 | NCAM1     | 98               | -11.15         |
| ENSG00000196083 | IL1RAP    | 94               | -17.14         |
| ENSG00000179331 | RAB39A    | 90               | -18.77         |
| ENSG00000179387 | ELMOD2    | 99               | -11.15         |
| ENSG00000182473 | EXOC7     | 96               | -11.84         |
| ENSG00000162105 | SHANK2    | 93               | -18.3          |
| ENSG00000173065 | FAM222B   | 96               | -12.76         |
| ENSG00000196459 | TRAPPC2   | 94               | -11.76         |
| ENSG00000172673 | THEMIS    | 98               | -17.01         |
| ENSG00000119917 | IFIT3     | 94               | -25.18         |
| ENSG00000117010 | ZNF684    | 98               | -14.67         |
| ENSG00000136936 | XPA       | 99               | -15.82         |
| ENSG00000136925 | TSTD2     | 98               | -11.33         |
| ENSG00000198176 | TFDP1     | 90               | -17.31         |
| ENSG00000185963 | BICD2     | 92               | -16.42         |
| ENSG00000134910 | STT3A     | 95               | -11.68         |
| ENSG00000113645 | WWC1      | 90               | -13.36         |
| ENSG00000114021 | NIT2      | 99               | -37.67         |
| ENSG00000101144 | BMP7      | 95               | -17.11         |
| ENSG00000197971 | MBP       | 91               | -17.92         |
| ENSG00000067798 | NAV3      | 94               | -16.73         |
| ENSG00000138036 | DYNC2LI1  | 95               | -11.68         |
| ENSG00000163702 | IL17RC    | 97               | -12.48         |
| ENSG00000006634 | DBF4      | 99               | -13.28         |
| ENSG00000115421 | PAPOLG    | 91               | -11.15         |
| ENSG00000091181 | IL5RA     | 91               | -15.37         |



|                 |           |    |        |
|-----------------|-----------|----|--------|
| ENSG00000114982 | KANSL3    | 92 | -17.11 |
| ENSG00000184206 | GOLGA6L4  | 97 | -12.11 |
| ENSG00000156976 | EIF4A2    | 96 | -18.28 |
| ENSG00000188559 | RALGAPA2  | 92 | -16.43 |
| ENSG00000151718 | WWC2      | 93 | -15.68 |
| ENSG00000197548 | ATG7      | 90 | -16.74 |
| ENSG00000133835 | HSD17B4   | 92 | -19.39 |
| ENSG00000178234 | GALNT11   | 91 | -19.12 |
| ENSG00000249242 | TMEM150C  | 93 | -18.53 |
| ENSG00000166747 | APIG1     | 99 | -15.82 |
| ENSG00000085982 | USP40     | 94 | -21.63 |
| ENSG00000065911 | MTHFD2    | 98 | -11.15 |
| ENSG00000144959 | NCEH1     | 94 | -12.99 |
| ENSG00000163389 | POGLUT1   | 99 | -14.62 |
| ENSG00000112130 | RNF8      | 97 | -16.6  |
| ENSG00000164466 | SFXN1     | 92 | -11.1  |
| ENSG00000164120 | HPGD      | 99 | -15.61 |
| ENSG00000145390 | USP53     | 99 | -14.73 |
| ENSG00000109805 | NCAPG     | 96 | -16.22 |
| ENSG00000156804 | FBXO32    | 93 | -11.04 |
| ENSG00000154263 | ABCA10    | 96 | -17.26 |
| ENSG00000086991 | NOX4      | 94 | -13.92 |
| ENSG00000149231 | CCDC82    | 90 | -17    |
| ENSG00000113522 | RAD50     | 95 | -33.77 |
| ENSG00000139220 | PPFIA2    | 92 | -11.46 |
| ENSG00000054983 | GALC      | 96 | -12.83 |
| ENSG00000119705 | SLIRP     | 96 | -14.69 |
| ENSG0000006007  | GDE1      | 99 | -13.45 |
| ENSG00000140945 | CDH13     | 91 | -17.16 |
| ENSG00000174446 | SNAPC5    | 98 | -16.95 |
| ENSG00000075336 | TIMM21    | 92 | -12.37 |
| ENSG00000150637 | CD226     | 91 | -24.3  |
| ENSG00000141452 | RMC1      | 94 | -16.69 |
| ENSG00000189045 | ANKDD1B   | 93 | -19.16 |
| ENSG00000172650 | AGAP5     | 99 | -19.16 |
| ENSG00000278662 | GOLGA6L10 | 97 | -12.11 |
| ENSG00000266714 | MYO15B    | 97 | -17.88 |
| ENSG00000065923 | SLC9A7    | 99 | -13.84 |
| ENSG00000145012 | LPP       | 90 | -14.31 |
| ENSG00000197978 | GOLGA6L9  | 98 | -12.11 |
| ENSG00000157613 | CREB3L1   | 93 | -20.67 |
| ENSG00000203963 | C1orf141  | 91 | -11.89 |
| ENSG00000176225 | RTTN      | 92 | -20.15 |
| ENSG00000159961 | OR3A3     | 93 | -14.22 |
| ENSG00000169814 | BTD       | 97 | -12.05 |
| ENSG00000126778 | SIX1      | 99 | -11.15 |
| ENSG00000117020 | AKT3      | 98 | -12.13 |

**Supplementary table 5. Target genes of bna-miR167a\_R-2**

| Gene ID         | Symbol    | TargetScan_score | miranda_Energy |
|-----------------|-----------|------------------|----------------|
| ENSG00000052841 | TTC17     | 96               | -15.22         |
| ENSG00000038295 | TLL1      | 97               | -28.56         |
| ENSG00000062725 | APPBP2    | 90               | -36.62         |
| ENSG00000067646 | ZFY       | 97               | -12.93         |
| ENSG00000073598 | FNDC8     | 96               | -14.27         |
| ENSG00000186847 | KRT14     | 99               | -13.4          |
| ENSG00000077009 | NMRK2     | 92               | -18.71         |
| ENSG00000112782 | CLIC5     | 93               | -29.63         |
| ENSG00000064601 | CTSA      | 99               | -16.98         |
| ENSG00000065060 | UHRF1BP1  | 97               | -33            |
| ENSG00000100426 | ZBED4     | 97               | -16.5          |
| ENSG00000100462 | PRMT5     | 91               | -15.29         |
| ENSG00000100678 | SLC8A3    | 92               | -15.26         |
| ENSG00000100711 | ZFYVE21   | 99               | -16.67         |
| ENSG00000101888 | NXT2      | 96               | -13.18         |
| ENSG00000104722 | NEFM      | 95               | -25.8          |
| ENSG00000105835 | NAMPT     | 91               | -15.08         |
| ENSG00000106004 | HOXA5     | 92               | -15.26         |
| ENSG00000108829 | LRRC59    | 93               | -28.89         |
| ENSG00000109163 | GNRHR     | 90               | -15.16         |
| ENSG00000111203 | ITFG2     | 95               | -13.99         |
| ENSG00000113140 | SPARC     | 95               | -15.95         |
| ENSG00000113722 | CDX1      | 97               | -16.63         |
| ENSG00000116209 | TMEM59    | 93               | -17.17         |
| ENSG00000117281 | CD160     | 92               | -15.96         |
| ENSG00000118972 | FGF23     | 90               | -21.48         |
| ENSG00000119906 | SLF2      | 97               | -18.13         |
| ENSG00000120256 | LRP11     | 94               | -42.45         |
| ENSG0000006576  | PHTF2     | 90               | -13.18         |
| ENSG00000127980 | PEX1      | 93               | -19.79         |
| ENSG00000128595 | CALU      | 91               | -11            |
| ENSG00000128713 | HOXD11    | 99               | -15.14         |
| ENSG00000088854 | C20orf194 | 90               | -15.08         |
| ENSG00000130700 | GATA5     | 94               | -30.76         |
| ENSG00000131504 | DIAPH1    | 95               | -27.9          |
| ENSG00000187272 | KRTAP9-8  | 93               | -41.06         |
| ENSG00000133067 | LGR6      | 92               | -12.9          |
| ENSG00000133800 | LYVE1     | 99               | -14.65         |
| ENSG00000134152 | KATNBL1   | 96               | -15.67         |
| ENSG00000134812 | CBLIF     | 92               | -14.42         |
| ENSG00000112182 | BACH2     | 93               | -40.13         |
| ENSG00000136231 | IGF2BP3   | 97               | -14.99         |
| ENSG00000136379 | ABHD17C   | 96               | -37.47         |
| ENSG00000137393 | RNF144B   | 91               | -27.49         |
| ENSG00000149305 | HTR3B     | 90               | -13.82         |
| ENSG00000137709 | POU2F3    | 92               | -12.84         |
| ENSG00000137936 | BCAR3     | 95               | -14.02         |
| ENSG00000138083 | SIX3      | 95               | -15.19         |

|                 |          |    |        |
|-----------------|----------|----|--------|
| ENSG00000138443 | ABI2     | 91 | -13.18 |
| ENSG00000070269 | TMEM260  | 92 | -12.72 |
| ENSG00000138615 | CILP     | 94 | -28.3  |
| ENSG00000041353 | RAB27B   | 94 | -14.98 |
| ENSG00000104219 | ZDHHC2   | 92 | -15.87 |
| ENSG00000071991 | CDH19    | 93 | -13.28 |
| ENSG00000116745 | RPE65    | 99 | -14.11 |
| ENSG00000186868 | MAPT     | 93 | -55.94 |
| ENSG00000108679 | LGALS3BP | 94 | -14.82 |
| ENSG00000003096 | KLHL13   | 95 | -27.48 |
| ENSG00000080561 | MID2     | 91 | -17.29 |
| ENSG00000108963 | DPH1     | 91 | -11    |
| ENSG00000115239 | ASB3     | 97 | -14.5  |
| ENSG00000115665 | SLC5A7   | 95 | -18.98 |
| ENSG00000115318 | LOXL3    | 94 | -17.49 |
| ENSG00000082258 | CCNT2    | 98 | -15.08 |
| ENSG00000109180 | OCIAD1   | 96 | -12.62 |
| ENSG00000115020 | PIKFYVE  | 95 | -17.29 |
| ENSG00000052795 | FNIP2    | 90 | -13.69 |
| ENSG00000114251 | WNT5A    | 90 | -10.48 |
| ENSG00000198522 | GPN1     | 97 | -24.41 |
| ENSG00000072803 | FBXW11   | 96 | -29    |
| ENSG00000101216 | GMEB2    | 91 | -12.19 |
| ENSG00000167074 | TEF      | 94 | -14.95 |
| ENSG00000065361 | ERBB3    | 92 | -26.44 |
| ENSG00000180257 | ZNF816   | 93 | -16.16 |
| ENSG00000116213 | WRAP73   | 96 | -13.18 |
| ENSG00000142677 | IL22RA1  | 96 | -13.66 |
| ENSG00000143147 | GPR161   | 95 | -13.66 |
| ENSG00000143457 | GOLPH3L  | 97 | -17.73 |
| ENSG00000143889 | HNRNPLL  | 99 | -15.84 |
| ENSG00000144036 | EXOC6B   | 93 | -15.59 |
| ENSG00000145375 | SPATA5   | 90 | -40.51 |
| ENSG00000148053 | NTRK2    | 90 | -42.85 |
| ENSG00000148143 | ZNF462   | 91 | -13.53 |
| ENSG00000149929 | HIRIP3   | 96 | -30.56 |
| ENSG00000149970 | CNKSR2   | 96 | -15.65 |
| ENSG00000151490 | PTPRO    | 98 | -34.56 |
| ENSG00000169550 | MUC15    | 95 | -13.31 |
| ENSG00000152315 | KCNK13   | 98 | -12.66 |
| ENSG00000152430 | BOLL     | 91 | -15.59 |
| ENSG00000152661 | GJA1     | 99 | -23.4  |
| ENSG00000152683 | SLC30A6  | 97 | -12.66 |
| ENSG00000152822 | GRM1     | 90 | -32.61 |
| ENSG00000152942 | RAD17    | 99 | -13.84 |
| ENSG00000153246 | PLA2R1   | 96 | -24.56 |
| ENSG00000153832 | FBXO36   | 99 | -32.64 |
| ENSG00000154556 | SORBS2   | 97 | -31.04 |
| ENSG00000154654 | NCAM2    | 94 | -16.3  |
| ENSG00000155465 | SLC7A7   | 91 | -19.6  |

|                 |          |    |        |
|-----------------|----------|----|--------|
| ENSG00000155744 | FAM126B  | 93 | -13.18 |
| ENSG00000156218 | ADAMTSL3 | 95 | -13.09 |
| ENSG00000156273 | BACH1    | 93 | -12.66 |
| ENSG00000215883 | CYB5RL   | 94 | -32.29 |
| ENSG00000127080 | IPPK     | 94 | -20.97 |
| ENSG00000157404 | KIT      | 91 | -15.42 |
| ENSG00000157470 | FAM81A   | 91 | -11.42 |
| ENSG00000046889 | PREX2    | 97 | -15.64 |
| ENSG00000026950 | BTN3A1   | 90 | -17.14 |
| ENSG00000158458 | NRG2     | 91 | -17.32 |
| ENSG00000140199 | SLC12A6  | 97 | -13.18 |
| ENSG00000124160 | NCOA5    | 92 | -15.49 |
| ENSG00000133433 | GSTT2B   | 92 | -12.52 |
| ENSG00000067955 | CBFB     | 99 | -14.65 |
| ENSG00000160181 | TFF2     | 99 | -13.38 |
| ENSG00000160606 | TLCD1    | 98 | -15.99 |
| ENSG00000160993 | ALKBH4   | 93 | -20.83 |
| ENSG00000162378 | ZYG11B   | 94 | -17.28 |
| ENSG00000162444 | RBP7     | 98 | -16.62 |
| ENSG00000162490 | DRAXIN   | 96 | -57.71 |
| ENSG00000162992 | NEUROD1  | 96 | -14.88 |
| ENSG00000163083 | INHBB    | 98 | -13.18 |
| ENSG00000163464 | CXCR1    | 92 | -28.82 |
| ENSG00000163491 | NEK10    | 90 | -10.48 |
| ENSG00000163638 | ADAMTS9  | 90 | -18.83 |
| ENSG00000145349 | CAMK2D   | 94 | -33.79 |
| ENSG00000164104 | HMGB2    | 90 | -11.91 |
| ENSG00000170390 | DCLK2    | 97 | -15.24 |
| ENSG00000164236 | ANKRD33B | 97 | -36.31 |
| ENSG00000164463 | CREBRF   | 90 | -36.22 |
| ENSG00000164542 | KIAA0895 | 94 | -14.34 |
| ENSG00000164609 | SLU7     | 95 | -14.63 |
| ENSG00000164695 | CHMP4C   | 99 | -22.19 |
| ENSG00000164823 | OSGIN2   | 90 | -12.84 |
| ENSG00000165983 | PTER     | 91 | -17.81 |
| ENSG00000166024 | R3HCC1L  | 92 | -14.33 |
| ENSG00000111670 | GNPTAB   | 98 | -12.66 |
| ENSG00000167302 | TEPSIN   | 97 | -16.43 |
| ENSG00000117090 | SLAMF1   | 95 | -31.66 |
| ENSG00000080546 | SESN1    | 92 | -22.28 |
| ENSG00000172461 | FUT9     | 97 | -45.21 |
| ENSG00000168564 | CDKN2AIP | 94 | -28.1  |
| ENSG00000130779 | CLIP1    | 94 | -12.06 |
| ENSG00000044115 | CTNNA1   | 93 | -13.58 |
| ENSG00000172458 | IL17D    | 91 | -19.45 |
| ENSG00000169047 | IRS1     | 93 | -13.9  |
| ENSG00000169252 | ADRB2    | 93 | -21.61 |
| ENSG00000154153 | RETREG1  | 91 | -21.36 |
| ENSG00000174444 | RPL4     | 95 | -37.13 |

|                 |                |    |        |
|-----------------|----------------|----|--------|
| ENSG00000175029 | CTBP2          | 96 | -15.38 |
| ENSG00000118263 | KLF7           | 91 | -31.28 |
| ENSG00000163320 | CGGBP1         | 93 | -16.78 |
| ENSG00000173705 | SUSD5          | 91 | -13.09 |
| ENSG00000175040 | CHST2          | 91 | -32.33 |
| ENSG00000172602 | RND1           | 92 | -12.69 |
| ENSG00000183434 | TFDP3          | 98 | -13.45 |
| ENSG00000111186 | WNT5B          | 90 | -15.2  |
| ENSG00000174151 | CYB561D1       | 90 | -23.44 |
| ENSG00000153048 | CARHSP1        | 94 | -17.95 |
| ENSG00000005483 | KMT2E          | 99 | -25.62 |
| ENSG00000109685 | NSD2           | 93 | -13.61 |
| ENSG00000138675 | FGF5           | 97 | -18.6  |
| ENSG00000112936 | C7             | 97 | -35.77 |
| ENSG00000152455 | SUV39H2        | 99 | -12.66 |
| ENSG00000163581 | SLC2A2         | 98 | -15.29 |
| ENSG00000196611 | MMP1           | 92 | -17.34 |
| ENSG00000157514 | TSC22D3        | 95 | -15.38 |
| ENSG00000170579 | DLGAP1         | 95 | -13.49 |
| ENSG00000179256 | SMCO3          | 94 | -12.19 |
| ENSG00000063438 | AHRR           | 91 | -42.06 |
| ENSG00000126945 | HNRNPH2        | 91 | -21.05 |
| ENSG00000149294 | NCAM1          | 93 | -30.61 |
| ENSG00000181023 | OR56B1         | 91 | -15.82 |
| ENSG00000171476 | HOPX           | 98 | -16.27 |
| ENSG00000181938 | GINS3          | 94 | -18.43 |
| ENSG00000005102 | MEOX1          | 96 | -19.78 |
| ENSG00000117069 | ST6GALNA<br>C5 | 94 | -13.69 |
| ENSG00000173166 | RAPH1          | 94 | -26.57 |
| ENSG00000006128 | TAC1           | 99 | -13.23 |
| ENSG00000197312 | DDI2           | 97 | -13.59 |
| ENSG00000129636 | ITFG1          | 95 | -14.53 |
| ENSG00000178718 | RPP25          | 91 | -16.54 |
| ENSG00000178741 | COX5A          | 99 | -18    |
| ENSG00000102189 | EEA1           | 95 | -14.19 |
| ENSG00000179632 | MAF1           | 98 | -28.62 |
| ENSG00000136167 | LCP1           | 95 | -12.72 |
| ENSG00000180090 | OR3A1          | 96 | -13.22 |
| ENSG00000178202 | POGLUT3        | 90 | -10.81 |
| ENSG00000115414 | FN1            | 90 | -26.76 |
| ENSG00000168952 | STXBP6         | 98 | -13.45 |
| ENSG00000165084 | C8orf34        | 91 | -18.54 |
| ENSG00000100335 | MIEF1          | 90 | -32.27 |
| ENSG00000153132 | CLGN           | 97 | -18.49 |
| ENSG00000114439 | BBX            | 96 | -32.29 |
| ENSG00000138759 | FRAS1          | 92 | -11.78 |
| ENSG00000180357 | ZNF609         | 96 | -29.61 |
| ENSG00000196652 | ZKSCAN5        | 97 | -15.28 |
| ENSG00000107371 | EXOSC3         | 90 | -14.58 |

|                 |          |    |        |
|-----------------|----------|----|--------|
| ENSG00000196230 | TUBB     | 93 | -13.95 |
| ENSG00000183077 | AFMID    | 94 | -17.81 |
| ENSG00000183476 | SH2D7    | 92 | -14.38 |
| ENSG00000183166 | CALN1    | 96 | -33.54 |
| ENSG00000115705 | TPO      | 99 | -17.22 |
| ENSG00000183840 | GPR39    | 90 | -14.78 |
| ENSG00000182628 | SKA2     | 92 | -18.52 |
| ENSG00000053372 | MRTO4    | 99 | -12.79 |
| ENSG00000177426 | TGIF1    | 91 | -14.69 |
| ENSG00000196981 | WDR5B    | 90 | -11.76 |
| ENSG00000185070 | FLRT2    | 91 | -24.61 |
| ENSG00000182601 | HS3ST4   | 91 | -28.11 |
| ENSG00000184277 | TM2D3    | 97 | -15.73 |
| ENSG00000186314 | PRELID2  | 93 | -29.73 |
| ENSG00000187068 | C3orf70  | 93 | -31.8  |
| ENSG00000069667 | RORA     | 94 | -31.84 |
| ENSG00000042088 | TDP1     | 92 | -19.29 |
| ENSG00000123416 | TUBA1B   | 98 | -12.67 |
| ENSG00000166261 | ZNF202   | 96 | -18.77 |
| ENSG00000147649 | MTDH     | 91 | -12.19 |
| ENSG00000185414 | MRPL30   | 90 | -28.93 |
| ENSG00000154645 | CHODL    | 90 | -14.41 |
| ENSG00000086300 | SNX10    | 97 | -12.66 |
| ENSG00000100505 | TRIM9    | 93 | -11    |
| ENSG00000135114 | OASL     | 93 | -32.55 |
| ENSG00000156313 | RPGR     | 95 | -13.85 |
| ENSG00000009954 | BAZ1B    | 95 | -13.97 |
| ENSG00000188505 | NCCRP1   | 94 | -18.19 |
| ENSG00000171049 | FPR2     | 95 | -14.57 |
| ENSG00000113328 | CCNG1    | 96 | -14.33 |
| ENSG00000135454 | B4GALNT1 | 95 | -16.5  |
| ENSG00000058668 | ATP2B4   | 96 | -13.76 |
| ENSG00000182606 | TRAK1    | 92 | -12.85 |
| ENSG00000180376 | CCDC66   | 94 | -13.18 |
| ENSG00000179603 | GRM8     | 98 | -34    |
| ENSG00000112486 | CCR6     | 96 | -16.71 |
| ENSG00000089289 | IGBP1    | 91 | -20.65 |
| ENSG00000156504 | FAM122B  | 98 | -15.32 |
| ENSG00000198947 | DMD      | 90 | -25.03 |
| ENSG00000124232 | RBPJL    | 93 | -13.2  |
| ENSG00000125354 | SEPTIN6  | 91 | -15.65 |
| ENSG00000188282 | RUFY4    | 94 | -31.66 |
| ENSG00000059122 | FLYWCH1  | 92 | -14.2  |
| ENSG00000164733 | CTSB     | 99 | -13.18 |
| ENSG00000188687 | SLC4A5   | 92 | -32.58 |
| ENSG00000075711 | DLG1     | 92 | -19.99 |
| ENSG00000119711 | ALDH6A1  | 97 | -25.51 |
| ENSG00000169062 | UPF3A    | 97 | -13.18 |
| ENSG00000012048 | BRCA1    | 99 | -14.17 |

|                 |               |    |        |
|-----------------|---------------|----|--------|
| ENSG00000122566 | HNRNPA2B<br>1 | 98 | -14.84 |
| ENSG00000149201 | CCDC81        | 91 | -14.87 |
| ENSG00000178053 | MLF1          | 96 | -13.18 |
| ENSG00000164209 | SLC25A46      | 91 | -14.53 |
| ENSG00000124222 | STX16         | 98 | -13.96 |
| ENSG00000197971 | MBP           | 96 | -13.47 |
| ENSG00000020129 | NCDN          | 93 | -14.43 |
| ENSG00000151461 | UPF2          | 94 | -26.86 |
| ENSG00000147419 | CCDC25        | 96 | -34.1  |
| ENSG00000146374 | RSPO3         | 94 | -12.66 |
| ENSG00000006831 | ADIPOR2       | 97 | -13.67 |
| ENSG00000056586 | RC3H2         | 94 | -27.35 |
| ENSG00000181722 | ZBTB20        | 91 | -36.67 |
| ENSG00000077935 | SMC1B         | 99 | -13.47 |
| ENSG00000163535 | SGO2          | 93 | -19.04 |
| ENSG00000197044 | ZNF441        | 90 | -27.13 |
| ENSG00000119125 | GDA           | 97 | -17.33 |
| ENSG00000109618 | SEPSECS       | 92 | -15.75 |
| ENSG00000138757 | G3BP2         | 97 | -13.82 |
| ENSG00000066739 | ATG2B         | 92 | -52.04 |
| ENSG00000197753 | LHFPL5        | 93 | -18.21 |
| ENSG00000196547 | MAN2A2        | 93 | -12.87 |
| ENSG00000168000 | BSCL2         | 90 | -11.84 |
| ENSG00000198326 | TMEM239       | 93 | -19.66 |
| ENSG00000183856 | IQGAP3        | 99 | -20.17 |
| ENSG00000198908 | BHLHB9        | 95 | -15.39 |
| ENSG00000198824 | CHAMP1        | 92 | -10.48 |
| ENSG00000198807 | PAX9          | 98 | -16.71 |
| ENSG00000143569 | UBAP2L        | 92 | -19.09 |
| ENSG00000135040 | NAA35         | 91 | -31.92 |
| ENSG00000198894 | CIPC          | 93 | -68.87 |
| ENSG00000204843 | DCTN1         | 92 | -13.43 |
| ENSG00000221852 | KRTAP1-5      | 90 | -10.48 |
| ENSG00000140931 | CMTM3         | 90 | -33.13 |
| ENSG00000118432 | CNR1          | 97 | -13.18 |
| ENSG00000143653 | SCCPDH        | 92 | -15.29 |
| ENSG00000026652 | AGPAT4        | 92 | -13.53 |
| ENSG00000143494 | VASH2         | 95 | -15.48 |
| ENSG00000123836 | PFKFB2        | 96 | -16.34 |
| ENSG00000055208 | TAB2          | 99 | -16.6  |
| ENSG00000112425 | EPM2A         | 98 | -12.19 |
| ENSG00000143590 | EFNA3         | 90 | -12.66 |
| ENSG00000203785 | SPRR2E        | 95 | -25.34 |
| ENSG00000213190 | MLLT11        | 99 | -12.66 |
| ENSG00000107651 | SEC23IP       | 95 | -25.95 |
| ENSG00000014123 | UFL1          | 93 | -10.69 |
| ENSG00000163393 | SLC22A15      | 97 | -12.19 |
| ENSG00000164414 | SLC35A1       | 98 | -13.18 |
| ENSG00000065618 | COL17A1       | 98 | -15.88 |

|                 |            |    |        |
|-----------------|------------|----|--------|
| ENSG00000147383 | NSDHL      | 94 | -20.73 |
| ENSG00000124203 | ZNF831     | 90 | -28.82 |
| ENSG00000177606 | JUN        | 98 | -13.59 |
| ENSG00000101882 | NKAP       | 92 | -14.68 |
| ENSG00000203995 | ZYG11A     | 93 | -14.7  |
| ENSG00000166317 | SYNPO2L    | 97 | -13.78 |
| ENSG00000180644 | PRF1       | 90 | -17.27 |
| ENSG00000094841 | UPRT       | 97 | -17.7  |
| ENSG00000158161 | EYA3       | 93 | -13.27 |
| ENSG00000151151 | IPMK       | 95 | -15.38 |
| ENSG00000150275 | PCDH15     | 93 | -14.1  |
| ENSG00000119326 | CTNNAL1    | 99 | -12.52 |
| ENSG00000148498 | PARD3      | 98 | -16.46 |
| ENSG00000136925 | TSTD2      | 91 | -11.77 |
| ENSG00000188938 | FAM120AOS  | 97 | -24.04 |
| ENSG00000204381 | LAYN       | 99 | -23.14 |
| ENSG00000101346 | POFUT1     | 97 | -29.6  |
| ENSG00000169508 | GPR183     | 93 | -11.08 |
| ENSG00000204574 | ABCF1      | 90 | -13.53 |
| ENSG00000204619 | PPP1R11    | 97 | -13.55 |
| ENSG00000160049 | DFFA       | 90 | -12.5  |
| ENSG00000135048 | CEMIP2     | 96 | -55.88 |
| ENSG00000178235 | SLITRK1    | 98 | -25.37 |
| ENSG00000165060 | FXN        | 93 | -15.4  |
| ENSG00000187626 | ZKSCAN4    | 91 | -12.5  |
| ENSG00000186470 | BTN3A2     | 90 | -17.14 |
| ENSG00000239886 | KRTAP9-2   | 93 | -41.06 |
| ENSG00000142606 | MMEL1      | 98 | -13.66 |
| ENSG00000165168 | CYBB       | 95 | -12.19 |
| ENSG00000103064 | SLC7A6     | 96 | -13.93 |
| ENSG00000134463 | ECHDC3     | 94 | -14.98 |
| ENSG00000124523 | SIRT5      | 99 | -12.66 |
| ENSG00000120688 | WBP4       | 96 | -15.96 |
| ENSG00000177627 | C12orf54   | 93 | -13.74 |
| ENSG00000046651 | OFD1       | 92 | -16.39 |
| ENSG00000241690 | AL035460.1 | 93 | -19.66 |
| ENSG00000102781 | KATNAL1    | 97 | -47.02 |
| ENSG00000139514 | SLC7A1     | 97 | -16.17 |
| ENSG00000112851 | ERBIN      | 93 | -12.94 |
| ENSG00000088832 | FKBP1A     | 90 | -53.35 |
| ENSG00000169299 | PGM2       | 96 | -14.7  |
| ENSG00000133488 | SEC14L4    | 93 | -30.62 |
| ENSG00000169777 | TAS2R1     | 96 | -13.18 |
| ENSG00000204764 | RANBP17    | 97 | -13.18 |
| ENSG00000070476 | ZXDC       | 95 | -15.75 |
| ENSG00000212659 | KRTAP9-6   | 92 | -25.4  |
| ENSG00000116030 | SUMO1      | 98 | -17.19 |
| ENSG00000110931 | CAMKK2     | 92 | -14.03 |
| ENSG00000140090 | SLC24A4    | 90 | -44.42 |



|                 |                    |    |        |
|-----------------|--------------------|----|--------|
| ENSG00000184845 | DRD1               | 98 | -14.73 |
| ENSG00000157593 | SLC35B2            | 94 | -26.73 |
| ENSG00000198083 | KRTAP9-9           | 94 | -37.64 |
| ENSG00000213424 | KRT222             | 92 | -17.08 |
| ENSG00000164663 | USP49              | 93 | -68.44 |
| ENSG00000170776 | AKAP13             | 96 | -14.08 |
| ENSG00000166164 | BRD7               | 99 | -13.96 |
| ENSG00000164038 | SLC9B2             | 91 | -24.11 |
| ENSG00000103353 | UBFD1              | 98 | -29.6  |
| ENSG00000077380 | DYNC1I2            | 97 | -12.31 |
| ENSG00000132356 | PRKAA1             | 94 | -22.76 |
| ENSG00000214102 | WEE2               | 95 | -25.4  |
| ENSG00000182405 | PGBD4              | 99 | -13.18 |
| ENSG00000168802 | CHTF8              | 93 | -12.19 |
| ENSG00000125813 | PAX1               | 93 | -18.74 |
| ENSG00000232196 | MTRNR2L4           | 98 | -15.99 |
| ENSG00000101266 | CSNK2A1            | 97 | -16.36 |
| ENSG00000183023 | SLC8A1             | 96 | -16.94 |
| ENSG00000234857 | HNRNPUL2-<br>BSCL2 | 90 | -11.84 |
| ENSG00000106346 | USP42              | 96 | -15.84 |
| ENSG00000131149 | GSE1               | 96 | -13.41 |
| ENSG00000164199 | ADGRV1             | 98 | -14.34 |
| ENSG00000218819 | TDRD15             | 99 | -18.85 |
| ENSG00000011258 | MBTD1              | 96 | -12.66 |
| ENSG00000122584 | NXPH1              | 96 | -14.27 |
| ENSG00000198198 | SZT2               | 93 | -17.54 |
| ENSG00000048052 | HDAC9              | 94 | -16.75 |
| ENSG00000222028 | PSMB11             | 94 | -16.4  |
| ENSG00000116171 | SCP2               | 97 | -12.66 |
| ENSG00000071082 | RPL31              | 95 | -14.8  |
| ENSG00000116031 | CD207              | 95 | -24.64 |
| ENSG00000160584 | SIK3               | 93 | -16.85 |
| ENSG00000197635 | DPP4               | 99 | -14.18 |
| ENSG00000186472 | PCLO               | 99 | -12.66 |
| ENSG00000148343 | MIGA2              | 93 | -18.12 |
| ENSG00000115415 | STAT1              | 98 | -33.12 |
| ENSG00000178460 | MCMDC2             | 93 | -16.58 |
| ENSG00000162951 | LRRTM1             | 90 | -11    |
| ENSG00000101353 | MROH8              | 99 | -20.02 |
| ENSG00000232070 | TMEM253            | 96 | -13.18 |
| ENSG00000168092 | PAFAH1B2           | 94 | -19.73 |
| ENSG00000169554 | ZEB2               | 92 | -13.77 |
| ENSG00000178252 | WDR6               | 90 | -39.98 |
| ENSG00000115966 | ATF2               | 92 | -33.73 |
| ENSG00000167378 | IRGQ               | 97 | -11.97 |
| ENSG00000130396 | AFDN               | 92 | -12.45 |
| ENSG00000106443 | PHF14              | 90 | -15.69 |
| ENSG00000143756 | FBXO28             | 98 | -14.15 |
| ENSG00000152217 | SETBP1             | 95 | -15.58 |

|                 |                  |    |        |
|-----------------|------------------|----|--------|
| ENSG00000129932 | DOHH             | 94 | -22    |
| ENSG00000112419 | PHACTR2          | 99 | -12.85 |
| ENSG00000083799 | CYLD             | 95 | -32.17 |
| ENSG00000172403 | SYNPO2           | 96 | -28.59 |
| ENSG00000213297 | ZNF625-<br>ZNF20 | 92 | -22.27 |
| ENSG00000144278 | GALNT13          | 99 | -12.66 |
| ENSG00000175166 | PSMD2            | 98 | -13.64 |
| ENSG00000196440 | ARMCX4           | 93 | -46.46 |
| ENSG00000087589 | CASS4            | 94 | -13.87 |
| ENSG00000231852 | CYP21A2          | 94 | -15.29 |
| ENSG00000164142 | FAM160A1         | 95 | -15.73 |
| ENSG00000117859 | OSBPL9           | 94 | -15.77 |
| ENSG00000115896 | PLCL1            | 97 | -17.01 |
| ENSG00000149554 | CHEK1            | 90 | -13.71 |
| ENSG00000137601 | NEK1             | 98 | -15.8  |
| ENSG00000176510 | OR10AC1          | 91 | -16.6  |
| ENSG00000164304 | CAGE1            | 98 | -31.31 |
| ENSG00000205835 | GMNC             | 94 | -35.08 |
| ENSG00000114648 | KLHL18           | 94 | -16.76 |
| ENSG00000149582 | TMEM25           | 98 | -13.63 |
| ENSG00000188729 | OSTN             | 99 | -16.53 |
| ENSG00000135968 | GCC2             | 99 | -13.18 |
| ENSG00000131018 | SYNE1            | 94 | -28.76 |
| ENSG00000198001 | IRAK4            | 92 | -14.41 |
| ENSG00000066382 | MPPED2           | 95 | -13.18 |
| ENSG00000105983 | LMBR1            | 93 | -54.99 |
| ENSG00000167995 | BEST1            | 93 | -32.87 |
| ENSG00000119004 | CYP20A1          | 90 | -15.79 |
| ENSG00000123104 | ITPR2            | 94 | -12.19 |
| ENSG00000279170 | TSTD3            | 95 | -11.18 |
| ENSG00000123485 | HJURP            | 93 | -14.14 |
| ENSG00000179869 | ABCA13           | 92 | -20.91 |
| ENSG00000185515 | BRCC3            | 98 | -22.75 |
| ENSG00000137221 | TJAP1            | 92 | -13.18 |
| ENSG00000123977 | DAW1             | 96 | -14.02 |
| ENSG00000225663 | MCRIP1           | 94 | -14.86 |
| ENSG00000163817 | SLC6A20          | 90 | -16.39 |
| ENSG00000065325 | GLP2R            | 91 | -13.18 |
| ENSG00000081154 | PCNP             | 90 | -18.93 |
| ENSG00000113368 | LMNB1            | 91 | -14.28 |
| ENSG00000114021 | NIT2             | 92 | -33.64 |
| ENSG00000090266 | NDUFB2           | 93 | -13.18 |
| ENSG00000187595 | ZNF385C          | 93 | -27.92 |
| ENSG00000206199 | ANKUB1           | 93 | -13.66 |
| ENSG00000196586 | MYO6             | 90 | -15.37 |
| ENSG00000105939 | ZC3HAV1          | 93 | -12.22 |
| ENSG00000105948 | TTC26            | 93 | -15.44 |
| ENSG00000104313 | EYA1             | 94 | -24.99 |
| ENSG00000004866 | ST7              | 99 | -14.02 |

|                 |          |    |        |
|-----------------|----------|----|--------|
| ENSG00000212993 | POU5F1B  | 95 | -13.77 |
| ENSG00000082781 | ITGB5    | 94 | -19.87 |
| ENSG00000109689 | STIM2    | 97 | -14.36 |
| ENSG00000165807 | PPP1R36  | 92 | -16.79 |
| ENSG00000135249 | RINT1    | 97 | -13.18 |
| ENSG00000095585 | BLNK     | 93 | -15.37 |
| ENSG00000135775 | COG2     | 90 | -55.07 |
| ENSG00000113971 | NPHP3    | 90 | -18.12 |
| ENSG00000051382 | PIK3CB   | 93 | -21.19 |
| ENSG00000065911 | MTHFD2   | 99 | -18.07 |
| ENSG00000143224 | PPOX     | 94 | -14.83 |
| ENSG00000136143 | SUCLA2   | 97 | -11    |
| ENSG00000103197 | TSC2     | 91 | -16.71 |
| ENSG00000180336 | MEIOC    | 98 | -13.42 |
| ENSG00000163635 | ATXN7    | 99 | -13.66 |
| ENSG00000076604 | TRAF4    | 93 | -16.08 |
| ENSG00000099338 | CATSPERG | 93 | -16.4  |
| ENSG00000114850 | SSR3     | 94 | -19.12 |
| ENSG00000155561 | NUP205   | 90 | -31.82 |
| ENSG00000187609 | EXD3     | 92 | -16.55 |
| ENSG00000009790 | TRAF3IP3 | 99 | -15.68 |
| ENSG00000203722 | RAET1G   | 99 | -13.62 |
| ENSG00000213213 | CCDC183  | 96 | -14.65 |
| ENSG00000136861 | CDK5RAP2 | 90 | -14.63 |
| ENSG00000112739 | PRPF4B   | 90 | -20.34 |
| ENSG00000102531 | FNDC3A   | 97 | -14.47 |
| ENSG00000129292 | PHF20L1  | 97 | -19.82 |
| ENSG00000170906 | NDUFA3   | 97 | -12.98 |
| ENSG00000187033 | SAMD7    | 92 | -20.8  |
| ENSG00000180537 | RNF182   | 91 | -13.48 |
| ENSG00000055732 | MCOLN3   | 91 | -13.91 |
| ENSG00000106477 | CEP41    | 91 | -17.53 |
| ENSG00000234545 | FAM133B  | 94 | -19.61 |
| ENSG00000188517 | COL25A1  | 90 | -28.02 |
| ENSG00000139597 | N4BP2L1  | 90 | -17.69 |
| ENSG00000141232 | TOB1     | 94 | -20.64 |
| ENSG00000184432 | COPB2    | 94 | -14.99 |
| ENSG00000113356 | POLR3G   | 90 | -16.42 |
| ENSG00000177646 | ACAD9    | 94 | -14.08 |
| ENSG00000168152 | THAP9    | 91 | -15.06 |
| ENSG00000145439 | CBR4     | 99 | -14.65 |
| ENSG00000124795 | DEK      | 90 | -15.17 |
| ENSG00000180822 | PSMG4    | 99 | -33.85 |
| ENSG00000163104 | SMARCD1  | 94 | -20.34 |
| ENSG00000151962 | RBM46    | 98 | -14.69 |
| ENSG00000198780 | FAM169A  | 97 | -14.02 |
| ENSG00000169247 | SH3TC2   | 93 | -29.55 |
| ENSG00000174227 | PIGG     | 96 | -16.47 |
| ENSG00000178222 | RNF212   | 91 | -14.22 |

|                 |            |    |        |
|-----------------|------------|----|--------|
| ENSG00000186952 | TMEM232    | 97 | -13.18 |
| ENSG00000109787 | KLF3       | 94 | -26.96 |
| ENSG00000137802 | MAPKBP1    | 94 | -33.63 |
| ENSG00000120440 | TTLL2      | 93 | -13.25 |
| ENSG00000138640 | FAM13A     | 97 | -12.66 |
| ENSG00000104408 | EIF3E      | 96 | -15.9  |
| ENSG00000106536 | POU6F2     | 99 | -13.18 |
| ENSG00000070501 | POLB       | 90 | -47.3  |
| ENSG00000147677 | EIF3H      | 99 | -13.31 |
| ENSG00000164944 | VIRMA      | 90 | -11.05 |
| ENSG00000114248 | LRRC31     | 92 | -14.5  |
| ENSG00000113712 | CSNK1A1    | 96 | -17.07 |
| ENSG00000254004 | ZNF260     | 90 | -17.22 |
| ENSG00000197892 | KIF13B     | 91 | -30.1  |
| ENSG00000188596 | CFAP54     | 90 | -21.37 |
| ENSG00000100557 | CCDC198    | 99 | -13.74 |
| ENSG00000165490 | DDIAS      | 99 | -15.15 |
| ENSG00000118513 | MYB        | 92 | -13.92 |
| ENSG00000129158 | SERGEF     | 96 | -13.44 |
| ENSG00000186318 | BACE1      | 91 | -11    |
| ENSG00000107593 | PKD2L1     | 90 | -12.86 |
| ENSG00000255302 | EID1       | 95 | -16.21 |
| ENSG00000110660 | SLC35F2    | 96 | -15.81 |
| ENSG00000123106 | CCDC91     | 98 | -13.18 |
| ENSG00000155957 | TMBIM4     | 98 | -17.45 |
| ENSG00000165821 | SALL2      | 97 | -36.67 |
| ENSG00000087494 | PTHLH      | 99 | -14.03 |
| ENSG00000061936 | SFSWAP     | 95 | -29.35 |
| ENSG00000134516 | DOCK2      | 95 | -14.3  |
| ENSG00000149948 | HMGA2      | 94 | -13.18 |
| ENSG00000149483 | TMEM138    | 94 | -30.48 |
| ENSG00000118600 | RXYLT1     | 97 | -14.32 |
| ENSG00000166557 | TMED3      | 92 | -17.08 |
| ENSG00000134531 | EMP1       | 96 | -16.89 |
| ENSG00000182173 | TSEN54     | 96 | -13.18 |
| ENSG00000107036 | RIC1       | 94 | -32.82 |
| ENSG00000175899 | A2M        | 97 | -29.55 |
| ENSG00000157895 | C12orf43   | 93 | -24.49 |
| ENSG00000057294 | PKP2       | 99 | -12.84 |
| ENSG00000139436 | GIT2       | 99 | -15.36 |
| ENSG00000111058 | ACSS3      | 98 | -15.29 |
| ENSG00000258830 | AC137834.1 | 91 | -19.54 |
| ENSG00000136010 | ALDH1L2    | 99 | -15.71 |
| ENSG00000203546 | AL139353.1 | 92 | -47.46 |
| ENSG00000121749 | TBC1D15    | 93 | -13.68 |
| ENSG00000079387 | SENP1      | 91 | -74.79 |
| ENSG00000100558 | PLEK2      | 92 | -15.49 |
| ENSG00000119599 | DCAF4      | 93 | -17.2  |
| ENSG00000205659 | LIN52      | 95 | -17.34 |
| ENSG00000092200 | RPGRIP1    | 94 | -14.2  |

|                 |          |    |        |
|-----------------|----------|----|--------|
| ENSG00000092020 | PPP2R3C  | 97 | -15.08 |
| ENSG00000133703 | KRAS     | 99 | -13.18 |
| ENSG00000100784 | RPS6KA5  | 93 | -17.86 |
| ENSG00000066629 | EML1     | 94 | -18.03 |
| ENSG00000139926 | FRMD6    | 91 | -10.48 |
| ENSG00000134138 | MEIS2    | 93 | -29.59 |
| ENSG00000184254 | ALDH1A3  | 99 | -12.66 |
| ENSG00000157734 | SNX22    | 93 | -14.38 |
| ENSG00000166262 | FAM227B  | 94 | -19.04 |
| ENSG00000166734 | GOLM2    | 94 | -13.06 |
| ENSG00000104129 | DNAJC17  | 93 | -14.54 |
| ENSG00000128944 | KNSTRN   | 98 | -13.95 |
| ENSG00000140463 | BBS4     | 98 | -13.9  |
| ENSG00000047346 | FAM214A  | 99 | -12.66 |
| ENSG00000197006 | METTL9   | 96 | -24.1  |
| ENSG00000159433 | STARD9   | 98 | -18.88 |
| ENSG00000092531 | SNAP23   | 92 | -18.1  |
| ENSG00000197912 | SPG7     | 93 | -13.23 |
| ENSG00000159459 | UBR1     | 98 | -15.77 |
| ENSG00000103528 | SYT17    | 94 | -12.94 |
| ENSG00000179776 | CDH5     | 97 | -14.49 |
| ENSG00000069943 | PIGB     | 98 | -12.66 |
| ENSG00000140386 | SCAPER   | 97 | -19    |
| ENSG00000187806 | TMEM202  | 97 | -20.36 |
| ENSG00000103248 | MTHFSD   | 90 | -11.48 |
| ENSG00000260314 | MRC1     | 97 | -17.51 |
| ENSG00000183914 | DNAH2    | 99 | -13.18 |
| ENSG00000184009 | ACTG1    | 93 | -17.45 |
| ENSG00000074755 | ZZEF1    | 93 | -13.9  |
| ENSG00000171861 | MRM3     | 94 | -12.66 |
| ENSG00000129197 | RPAIN    | 94 | -13.75 |
| ENSG00000065534 | MYLK     | 96 | -19.07 |
| ENSG00000068489 | PRR11    | 93 | -12.48 |
| ENSG00000159640 | ACE      | 90 | -31.37 |
| ENSG00000108592 | FTSJ3    | 91 | -27.87 |
| ENSG00000101695 | RNF125   | 94 | -16.06 |
| ENSG00000266714 | MYO15B   | 96 | -12.98 |
| ENSG00000132589 | FLOT2    | 94 | -29.15 |
| ENSG00000108691 | CCL2     | 93 | -13.18 |
| ENSG00000206432 | TMEM200C | 97 | -12.66 |
| ENSG00000266412 | NCOA4    | 97 | -17.47 |
| ENSG00000109046 | WSB1     | 97 | -22.14 |
| ENSG00000178927 | CYBC1    | 94 | -12.87 |
| ENSG00000141622 | RNF165   | 94 | -12.66 |
| ENSG00000167434 | CA4      | 94 | -14.65 |
| ENSG00000166569 | CPLX4    | 94 | -18.23 |
| ENSG00000152223 | EPG5     | 94 | -29.37 |
| ENSG00000118900 | UBN1     | 92 | -17.67 |
| ENSG00000175354 | PTPN2    | 96 | -12.87 |
| ENSG00000087157 | PGS1     | 96 | -18.81 |

|                 |            |    |        |
|-----------------|------------|----|--------|
| ENSG00000127540 | UQCR11     | 94 | -16.42 |
| ENSG00000171791 | BCL2       | 92 | -27.04 |
| ENSG00000130876 | SLC7A10    | 96 | -22.03 |
| ENSG00000150477 | KIAA1328   | 96 | -31.1  |
| ENSG00000126581 | BECN1      | 96 | -18.77 |
| ENSG00000132478 | UNK        | 95 | -14.5  |
| ENSG00000204604 | ZNF468     | 95 | -12.42 |
| ENSG00000178935 | ZNF552     | 95 | -15.35 |
| ENSG00000188785 | ZNF548     | 97 | -17.06 |
| ENSG00000123815 | COQ8B      | 94 | -15.13 |
| ENSG00000101158 | NELFCD     | 94 | -19.94 |
| ENSG00000283580 | AC098484.3 | 98 | -17.09 |
| ENSG00000117569 | PTBP2      | 91 | -45.86 |
| ENSG00000134207 | SYT6       | 98 | -35.09 |
| ENSG00000103148 | NPRL3      | 94 | -13.81 |
| ENSG00000144935 | TRPC1      | 91 | -11    |
| ENSG00000253846 | PCDHGA10   | 98 | -14.98 |
| ENSG00000076351 | SLC46A1    | 96 | -14.05 |
| ENSG00000101365 | IDH3B      | 95 | -18.42 |
| ENSG00000276023 | DUSP14     | 94 | -14.78 |
| ENSG00000275700 | AATF       | 90 | -12.98 |
| ENSG00000189339 | SLC35E2B   | 96 | -15.42 |
| ENSG00000085365 | SCAMP1     | 90 | -19.11 |
| ENSG00000152242 | C18orf25   | 98 | -19.61 |
| ENSG00000128266 | GNAZ       | 98 | -13.18 |
| ENSG00000278053 | DDX52      | 92 | -21.76 |
| ENSG00000132128 | LRRC41     | 93 | -22.37 |
| ENSG00000024862 | CCDC28A    | 90 | -14.71 |
| ENSG00000179583 | CIITA      | 96 | -19.98 |
| ENSG00000161956 | SENP3      | 94 | -14.67 |
| ENSG00000118242 | MREG       | 92 | -15.68 |
| ENSG00000163214 | DHX57      | 93 | -28.74 |
| ENSG00000099984 | GSTT2      | 92 | -12.52 |
| ENSG00000273820 | USP27X     | 98 | -15.5  |
| ENSG00000101413 | RPRD1B     | 93 | -13.44 |
| ENSG00000095596 | CYP26A1    | 95 | -41.19 |
| ENSG00000114062 | UBE3A      | 91 | -27.16 |
| ENSG00000165304 | MELK       | 93 | -17.39 |
| ENSG00000023041 | ZDHHC6     | 94 | -22.5  |
| ENSG00000108231 | LGI1       | 97 | -13.05 |
| ENSG00000259316 | AC087632.2 | 97 | -21.94 |
| ENSG00000189195 | BTBD8      | 96 | -28.94 |
| ENSG00000136531 | SCN2A      | 96 | -14.51 |
| ENSG00000283208 | AC001226.2 | 91 | -13.65 |
| ENSG00000197309 | OR10D3     | 95 | -12.66 |
| ENSG00000177000 | MTHFR      | 92 | -16.97 |
| ENSG00000284732 | AP002512.3 | 96 | -15.24 |
| ENSG00000081923 | ATP8B1     | 91 | -29.74 |
| ENSG00000133835 | HSD17B4    | 97 | -16.78 |
| ENSG00000264058 | AC073508.2 | 92 | -17.08 |

|                 |            |    |        |
|-----------------|------------|----|--------|
| ENSG00000215301 | DDX3X      | 95 | -13.81 |
| ENSG00000060718 | COL11A1    | 93 | -10.5  |
| ENSG00000113163 | CERT1      | 96 | -15.22 |
| ENSG00000116035 | VAX2       | 96 | -16.41 |
| ENSG00000168032 | ENTPD3     | 90 | -29.76 |
| ENSG00000088035 | ALG6       | 96 | -16.33 |
| ENSG00000187510 | PLEKHG7    | 91 | -12.19 |
| ENSG00000077800 | FKBP6      | 97 | -32.95 |
| ENSG00000172175 | MALT1      | 94 | -15.77 |
| ENSG00000198589 | LRBA       | 90 | -16.82 |
| ENSG00000035681 | NSMAF      | 91 | -19.05 |
| ENSG00000198677 | TTC37      | 93 | -17.03 |
| ENSG00000285816 | AP000944.5 | 94 | -25.86 |
| ENSG00000285708 | AC097634.4 | 90 | -37.19 |
| ENSG00000131174 | COX7B      | 94 | -23.29 |
| ENSG00000261609 | GAN        | 90 | -17.51 |
| ENSG00000213949 | ITGA1      | 92 | -38.34 |
| ENSG00000170581 | STAT2      | 92 | -14.21 |
| ENSG00000078747 | ITCH       | 92 | -19.58 |
| ENSG00000070831 | CDC42      | 99 | -18.66 |
| ENSG00000198707 | CEP290     | 91 | -14.22 |
| ENSG00000061938 | TNK2       | 91 | -13.89 |
| ENSG00000165868 | HSPA12A    | 94 | -48.26 |
| ENSG00000106692 | FKTN       | 90 | -13.46 |
| ENSG00000121957 | GPSM2      | 98 | -16.04 |
| ENSG00000116991 | SIPA1L2    | 97 | -13.59 |
| ENSG00000168356 | SCN11A     | 92 | -25.07 |
| ENSG00000153944 | MSI2       | 98 | -17.41 |
| ENSG00000156709 | AIFM1      | 97 | -17.38 |
| ENSG00000145907 | G3BP1      | 91 | -12.19 |
| ENSG00000135047 | CTSL       | 96 | -13.18 |
| ENSG00000157601 | MX1        | 93 | -17.69 |
| ENSG00000127914 | AKAP9      | 94 | -20.88 |
| ENSG00000118217 | ATF6       | 97 | -14.57 |
| ENSG00000055609 | KMT2C      | 93 | -48.08 |
| ENSG00000120697 | ALG5       | 90 | -16.53 |
| ENSG00000111331 | OAS3       | 90 | -31.73 |
| ENSG00000043143 | JADE2      | 90 | -19.42 |

**Supplementray table 6. GO analysis of target genes of miR167a**

| GO Id      | Function           | GO_term                                                                           | S gene number | TS gene number | B gene number | TB gene number | Pvalue of Fisher's Exact Test |
|------------|--------------------|-----------------------------------------------------------------------------------|---------------|----------------|---------------|----------------|-------------------------------|
| GO:0005515 | molecular_function | protein binding                                                                   | 514           | 661            | 15,028        | 22,750         | 1.72E-11                      |
| GO:0005737 | cellular_component | cytoplasm                                                                         | 274           | 661            | 7,411         | 22,750         | 7.49E-07                      |
| GO:0005654 | cellular_component | nucleoplasm                                                                       | 167           | 661            | 4,200         | 22,750         | 6.60E-06                      |
| GO:0005856 | cellular_component | cytoskeleton                                                                      | 71            | 661            | 1,478         | 22,750         | 2.12E-05                      |
| GO:0005634 | cellular_component | nucleus                                                                           | 257           | 661            | 7,191         | 22,750         | 3.54E-05                      |
| GO:0016324 | cellular_component | apical plasma membrane                                                            | 26            | 661            | 377           | 22,750         | 4.75E-05                      |
| GO:0005829 | cellular_component | cytosol                                                                           | 209           | 661            | 5,693         | 22,750         | 6.24E-05                      |
| GO:0099566 | biological_process | regulation of postsynaptic cytosolic calcium ion concentration                    | 4             | 661            | 11            | 22,750         | 1.98E-04                      |
| GO:0048066 | biological_process | developmental pigmentation                                                        | 4             | 661            | 11            | 22,750         | 1.98E-04                      |
| GO:0030054 | cellular_component | cell junction                                                                     | 50            | 661            | 1,014         | 22,750         | 1.99E-04                      |
| GO:0048496 | biological_process | maintenance of animal organ identity                                              | 3             | 661            | 5             | 22,750         | 2.34E-04                      |
| GO:0007049 | biological_process | cell cycle                                                                        | 37            | 661            | 689           | 22,750         | 2.75E-04                      |
| GO:0034063 | biological_process | stress granule assembly                                                           | 5             | 661            | 23            | 22,750         | 4.44E-04                      |
| GO:0044389 | molecular_function | ubiquitin-like protein ligase binding                                             | 5             | 661            | 23            | 22,750         | 4.44E-04                      |
| GO:1990822 | biological_process | basic amino acid transmembrane transport                                          | 3             | 661            | 6             | 22,750         | 4.57E-04                      |
| GO:2000378 | biological_process | negative regulation of reactive oxygen species metabolic process                  | 5             | 661            | 24            | 22,750         | 5.48E-04                      |
| GO:0015807 | biological_process | L-amino acid transport                                                            | 4             | 661            | 14            | 22,750         | 5.60E-04                      |
| GO:0007601 | biological_process | visual perception                                                                 | 16            | 661            | 218           | 22,750         | 6.73E-04                      |
| GO:0050910 | biological_process | detection of mechanical stimulus involved in sensory perception of sound          | 4             | 661            | 15            | 22,750         | 7.47E-04                      |
| GO:0000226 | biological_process | microtubule cytoskeleton organization                                             | 13            | 661            | 159           | 22,750         | 7.79E-04                      |
| GO:2000052 | biological_process | pathway                                                                           | 3             | 661            | 7             | 22,750         | 7.83E-04                      |
| GO:0099580 | molecular_function | ion antiporter activity involved in regulation of postsynaptic membrane potential | 2             | 661            | 2             | 22,750         | 8.43E-04                      |
| GO:0031312 | cellular_component | extrinsic component of organelle membrane                                         | 2             | 661            | 2             | 22,750         | 8.43E-04                      |
| GO:0062029 | biological_process | positive regulation of stress granule assembly                                    | 2             | 661            | 2             | 22,750         | 8.43E-04                      |
| GO:0097324 | biological_process | melanocyte migration                                                              | 2             | 661            | 2             | 22,750         | 8.43E-04                      |
| GO:0010508 | biological_process | positive regulation of autophagy                                                  | 8             | 661            | 69            | 22,750         | 8.55E-04                      |
| GO:0015631 | molecular_function | tubulin binding                                                                   | 8             | 661            | 70            | 22,750         | 9.41E-04                      |



|            |                    |                                                     |    |     |     |        |          |
|------------|--------------------|-----------------------------------------------------|----|-----|-----|--------|----------|
| GO:0016604 | cellular_component | nuclear body                                        | 22 | 661 | 373 | 22,750 | 1.45E-03 |
| GO:0048471 | cellular_component | perinuclear region of cytoplasm                     | 37 | 661 | 760 | 22,750 | 1.64E-03 |
| GO:0015174 | molecular_function | basic amino acid transmembrane transporter activity | 3  | 661 | 9   | 22,750 | 1.80E-03 |
| GO:0035497 | molecular_function | cAMP response element binding                       | 4  | 661 | 19  | 22,750 | 1.93E-03 |
| GO:0015297 | molecular_function | antiporter activity                                 | 7  | 661 | 63  | 22,750 | 2.29E-03 |
| GO:0051010 | molecular_function | microtubule plus-end binding                        | 4  | 661 | 20  | 22,750 | 2.36E-03 |
| GO:0019002 | molecular_function | GMP binding                                         | 2  | 661 | 3   | 22,750 | 2.48E-03 |
| GO:0019959 | molecular_function | interleukin-8 binding                               | 2  | 661 | 3   | 22,750 | 2.48E-03 |

**Supplementary table 7. KEGG analysis of target genes of miR167a**

| Pathway Id | pathway description                             | S gene number | TS gene number | B gene number | TB gene number | Pvalue of Fisher's Exact Test |
|------------|-------------------------------------------------|---------------|----------------|---------------|----------------|-------------------------------|
| ko04210    | Apoptosis                                       | 13            | 285            | 136           | 8,039          | 1.03E-03                      |
| ko05412    | Arrhythmogenic right ventricular cardiomyopathy | 9             | 285            | 77            | 8,039          | 1.52E-03                      |
| ko04933    | complications                                   | 10            | 285            | 100           | 8,039          | 2.77E-03                      |
| ko04140    | Autophagy - animal                              | 12            | 285            | 137           | 8,039          | 3.34E-03                      |
| ko04211    | Longevity regulating pathway                    | 9             | 285            | 89            | 8,039          | 4.13E-03                      |
| ko05162    | Measles                                         | 12            | 285            | 142           | 8,039          | 4.47E-03                      |
| ko04621    | NOD-like receptor signaling pathway             | 14            | 285            | 181           | 8,039          | 4.93E-03                      |
| ko04932    | Non-alcoholic fatty liver disease               | 12            | 285            | 150           | 8,039          | 6.90E-03                      |
| ko04722    | Neurotrophin signaling pathway                  | 10            | 285            | 119           | 8,039          | 9.47E-03                      |
| ko05418    | Fluid shear stress and atherosclerosis          | 11            | 285            | 138           | 8,039          | 9.76E-03                      |
